# Supplementary material for: Analysis of mononucleotides by tandem mass spectrometry: investigation of fragmentation pathways for phosphate- and ribose-modified nucleotide analogues
Source: PubMed Central journal article supplement (PMC5567097; doi:10.1038/s41598-017-09416-6), 2017-08-21
Supplement: 41598_2017_9416_MOESM1_ESM.pdf [file 41598_2017_9416_MOESM1_ESM.pdf]

**Analysis of mononucleotides by tandem mass spectrometry: investigation of fragmentation pathways for phosphate- and ribose-modified nucleotide analogues**

**Dominika Strzelecka,<sup>1</sup> Sebastian Chmielinski,<sup>1,2</sup> Sylwia Bednarek,<sup>1,2</sup> Jacek Jemielity,<sup>2</sup> Joanna Kowalska<sup>1,\*</sup>**

*<sup>1</sup>Division of Biophysics, Institute of Experimental Physics, Faculty of Physics, University of Warsaw, Pasteura 5, 02-093 Warsaw, Poland*

*<sup>2</sup>Centre of New Technologies, University of Warsaw, Banacha 2c, 02-097 Warsaw, Poland*

*\*E-mail: [jkowalska@fuw.edu.pl](mailto:jkowalska@fuw.edu.pl)*

Supplementary File

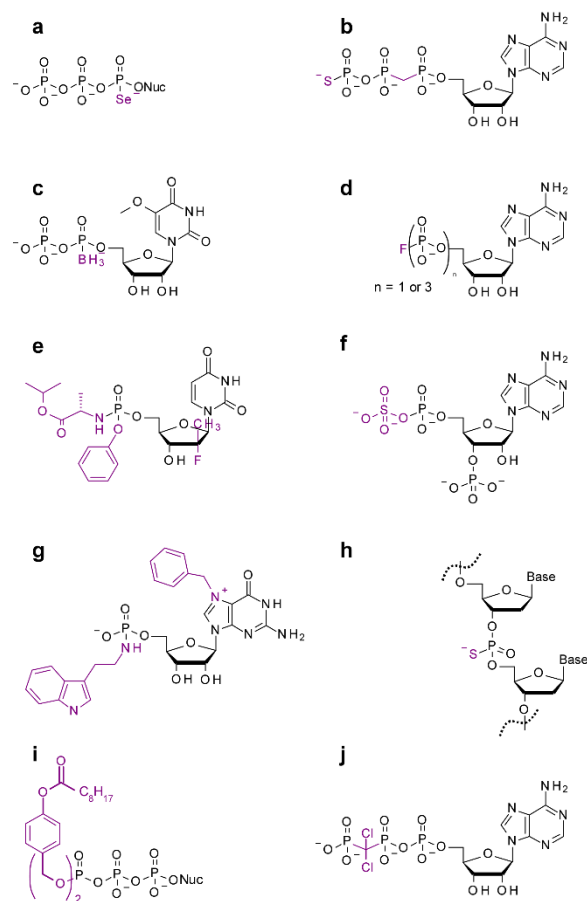

**Fig. S1. Examples of naturally occurring phosphate- and ribose-modified nucleotides or synthetic analogues with biological and therapeutic applications.** a) NTP $\alpha$ Se – polymerase substrates for nucleic acids modification<sup>1</sup>; b) ATP $\alpha$ S, $\beta$ - $\gamma$ CH<sub>2</sub> – chelating agent with potential in Alzheimer’s treatment<sup>2</sup>; c) 5-O-MeUDP $\alpha$ BH<sub>3</sub> – agonist of P2Y receptor<sup>3</sup>; d) NMPF, NDPF, and NTPF – unnatural substrates of HIT family enzymes<sup>4</sup>; e) sofosbuvir – anti-viral drug<sup>5</sup>; f) PAPS – natural compound, universal sulfotransferase cofactor<sup>6</sup>; g) 4E-i – prodrug form of translation inhibitor targeting eIF4E protein<sup>7,8</sup>; h) phosphorothioate DNA – synthetic modification used for therapeutic oligonucleotide (ON) stabilization, later discovered in bacteria<sup>9</sup>; i) ProPPNucleotides – cell-permeable NTP prodrugs<sup>10</sup>; j) ATP $\beta$ - $\gamma$ CCl<sub>2</sub> – metabolite of bisphosphonate anti-osteoporotic drug, clodronate<sup>11-13</sup>. Nuc = 5'-nucleosidyl moiety, Base = Adenine, Guanine, Cytosine, or Thymine.

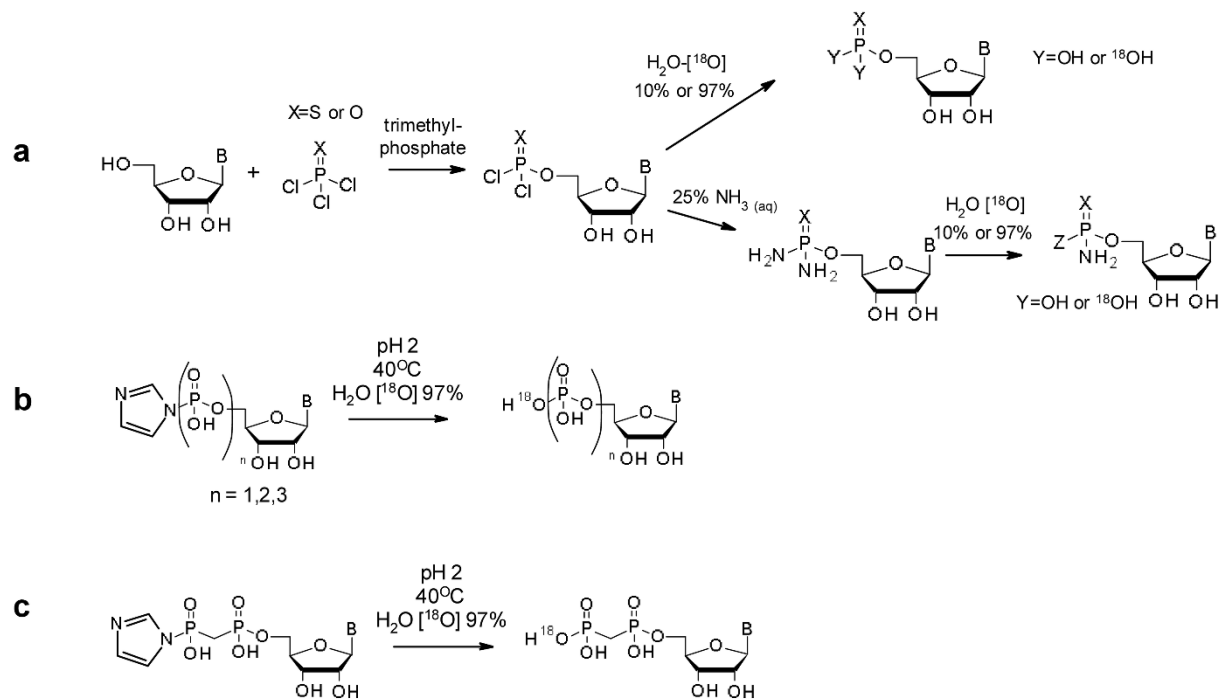

Fig. S2. **Syntheses of isotopically labelled nucleotides carried out in this work:** A - Nucleoside 5'-phosphorylation, nucleoside 5'-thiophosphorylation, nucleoside 5'-amidophosphorylation, B and C - P-Imidazole hydrolysis.

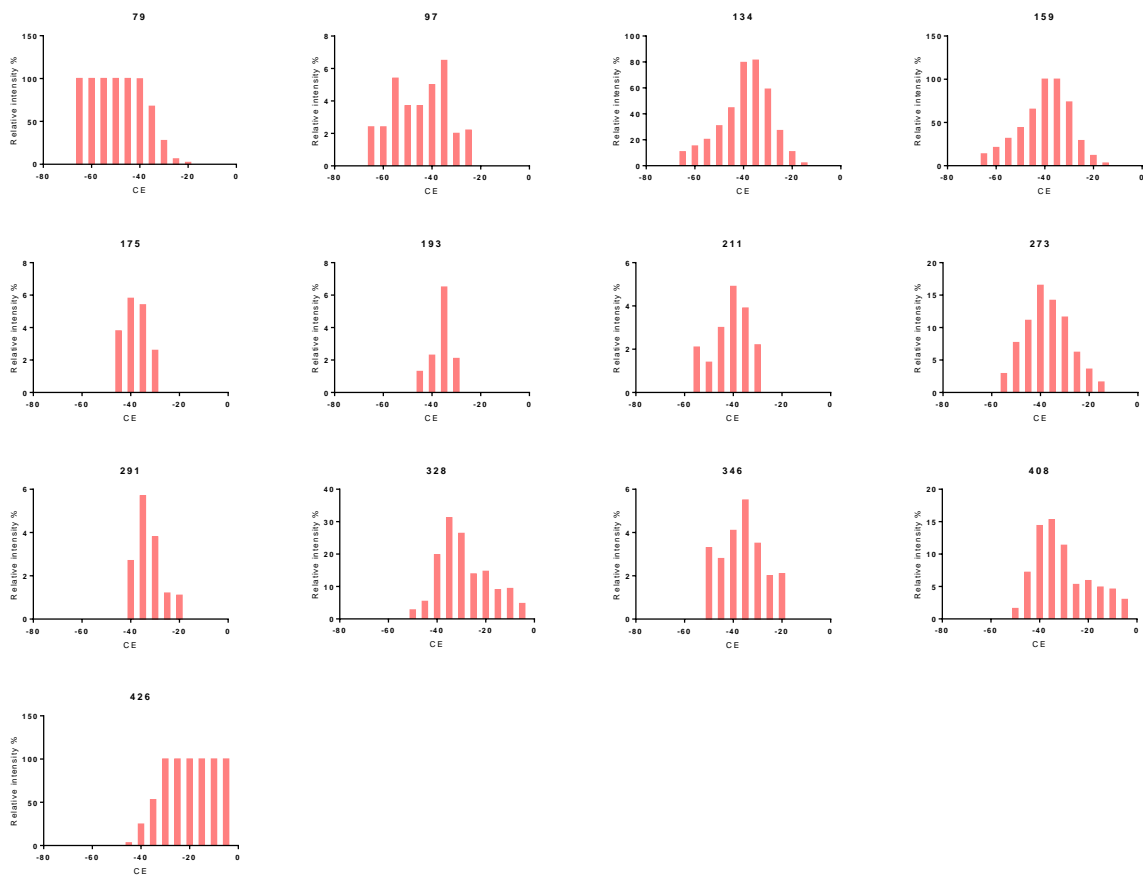

**Fig. S3. Fragment ion relative intensity distribution depending on Collision Energy (CE) for ADP.**

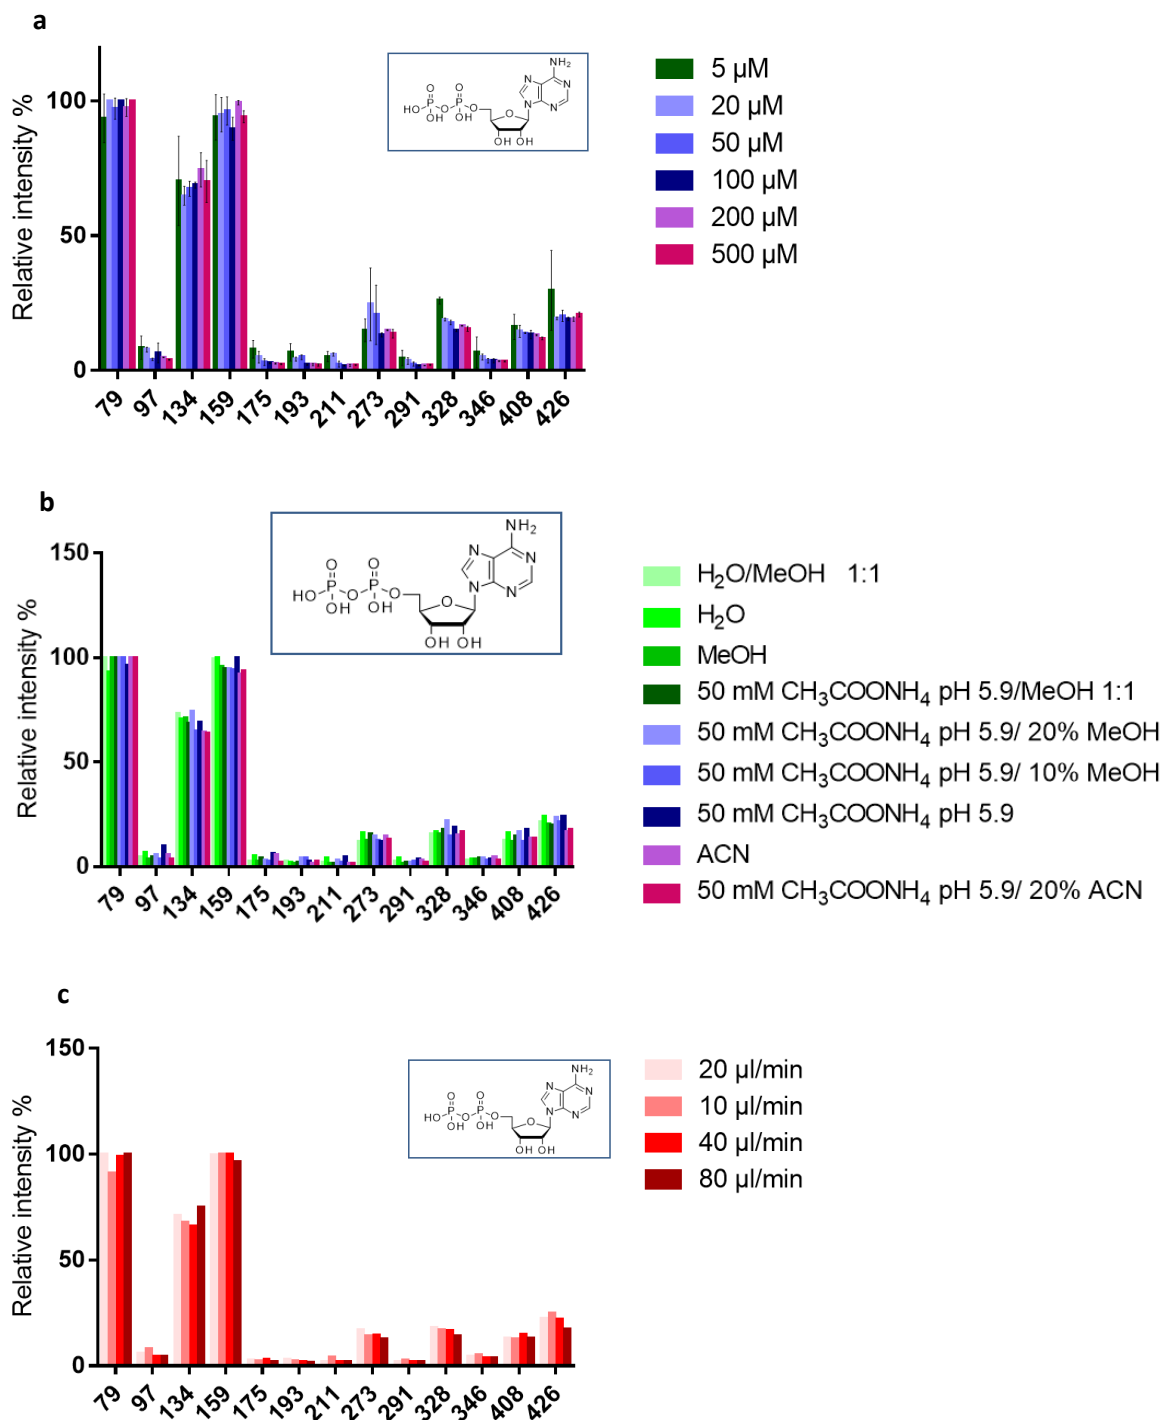

Fig. S4. **Relative ion intensities in ESI(-) MS/MS spectra** of: A) ADP dissolved in 50 mM CH<sub>3</sub>COONH<sub>4</sub> pH 5.9/ 20% MeOH at various concentrations. The data shown are mean relative intensities from duplicate experiments +/- S.D. B) 50  $\mu$ M ADP depending on solvent composition. C. 50  $\mu$ M ADP in 50 mM CH<sub>3</sub>COONH<sub>4</sub> pH 5.9/ 20% MeOH depending on infusion flow rate.

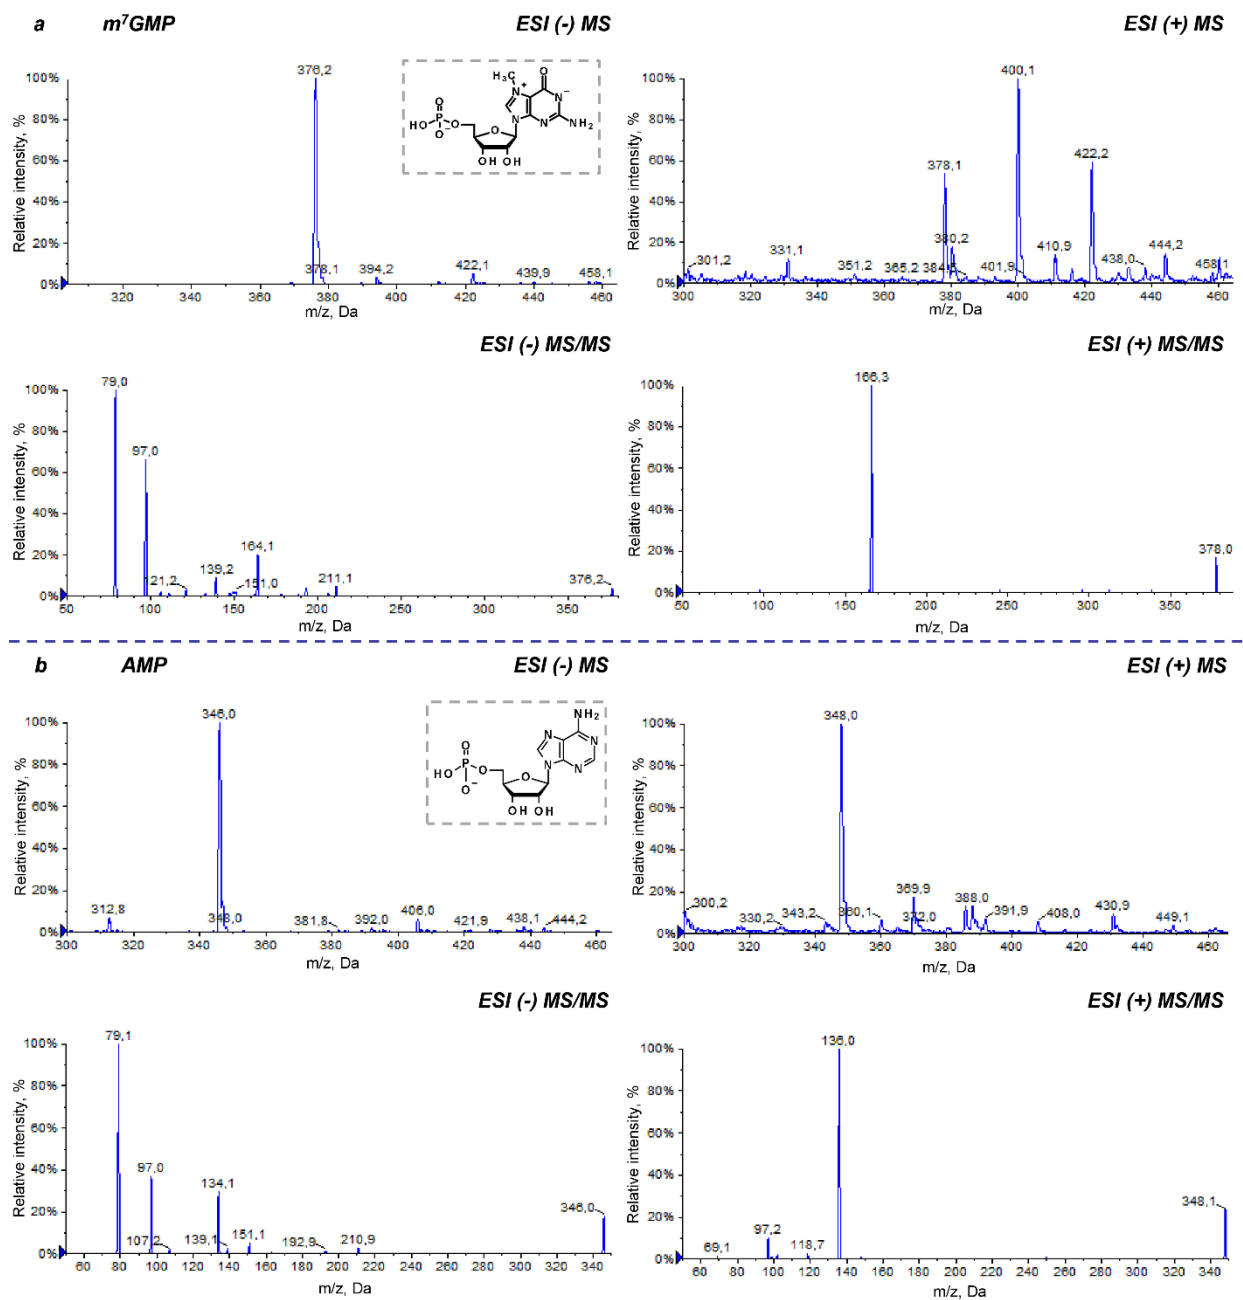

Fig. S5. Comparison of MS and MS/MS spectra in positive and negative ion mode for *m*<sup>7</sup>GMP (A) and AMP (B).

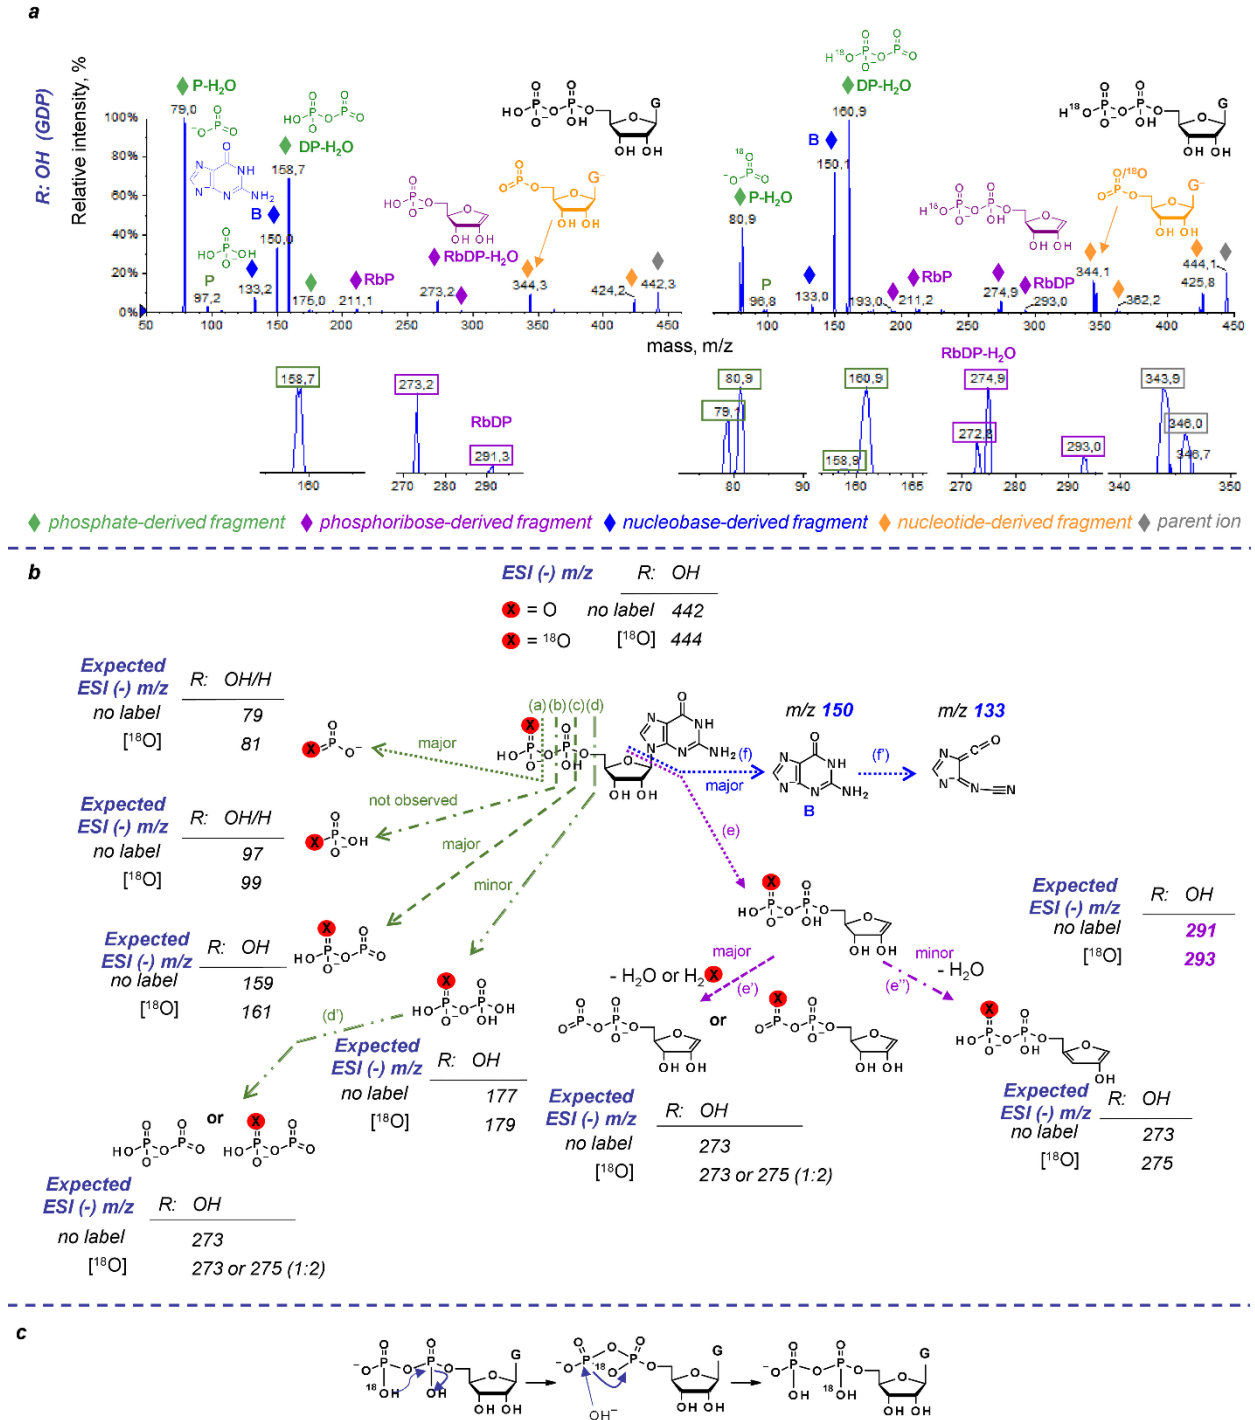

Fig. S6. **Negative-ion mode fragmentation of nucleoside 5'-diphosphates.** a) ESI(-)/MS/MS spectra of GDP and its  $\beta$ - $^{18}\text{O}$ -labelled analogue. b) Proposed fragmentation pathways for NDPs, exemplified by the fragmentation of GDP. c) Possible mechanism for the transfer of  $^{18}\text{O}$  from the  $\beta$ -phosphate to  $\alpha$ -phosphate, explaining the presence of  $^{18}\text{O}$ -labelled guanosine monophosphate derivatives in the MS/MS spectrum of  $\beta$ - $^{18}\text{O}$ -GDP.





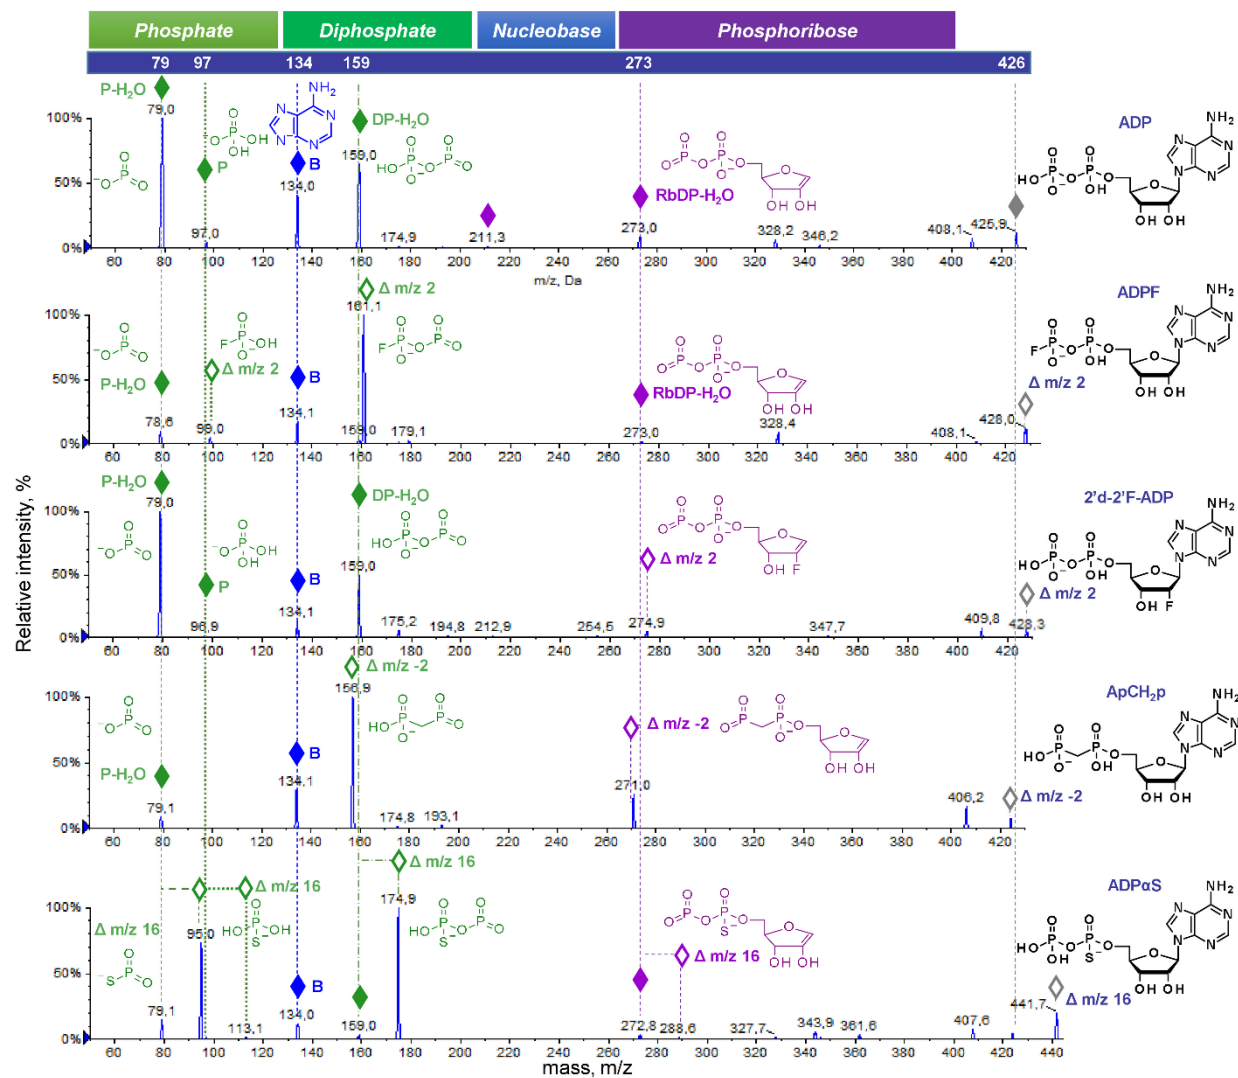

Fig. S8. **Analysis of ADP and its phosphate- and ribose-modified analogues by ESI(-)MS/MS.** In each spectrum, fragmentation ions enabling determination of the substitution site (nucleobase *versus* phosphate *versus* ribose) are indicated with diamonds (◇) and their proposed structures are depicted.

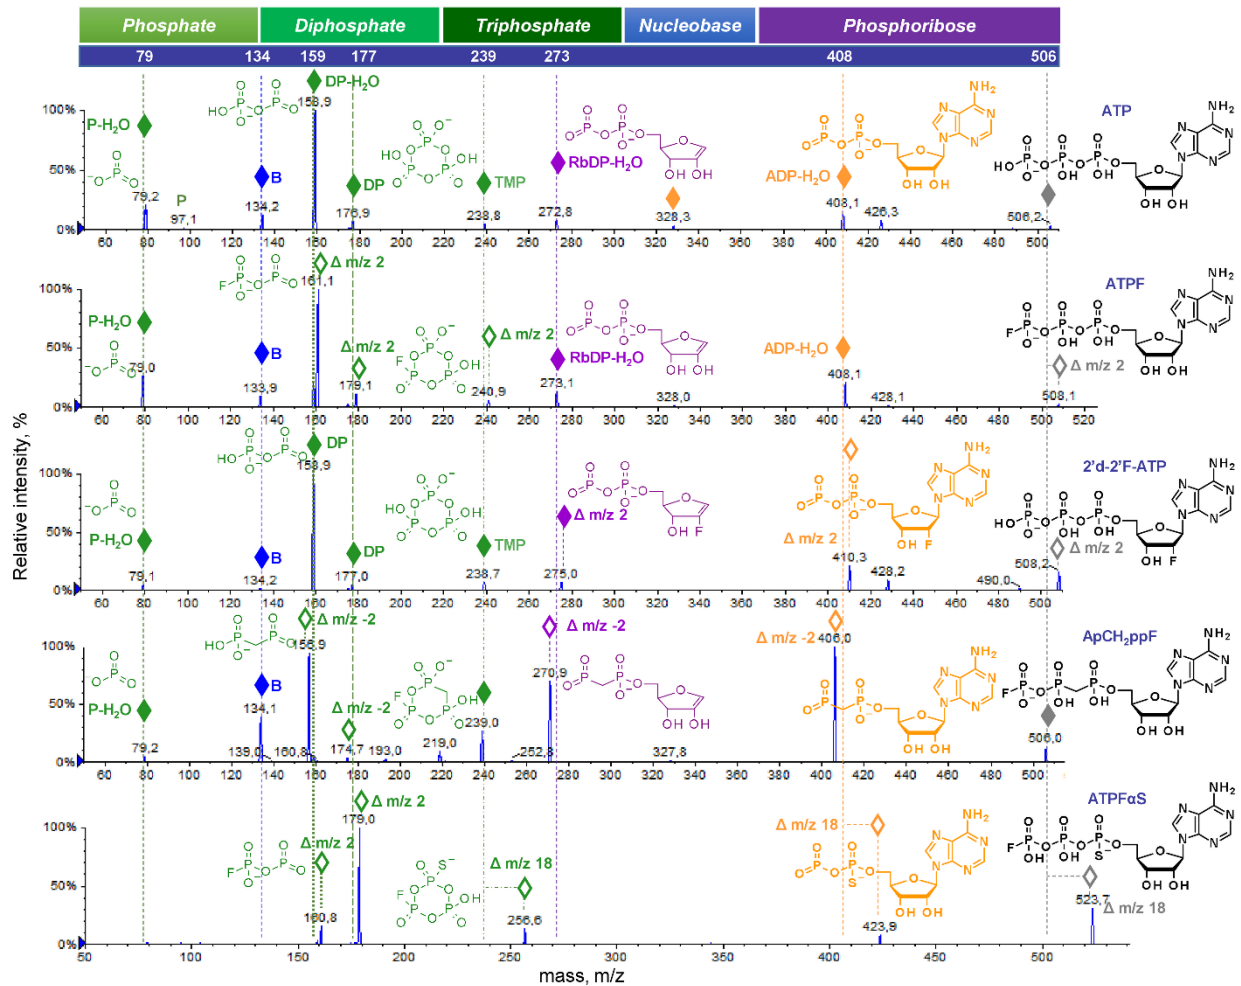

Fig. S9. Analysis of ATP and its phosphate- and ribose-modified analogues by ESI(-)MS/MS. In each spectrum, fragmentation ions enabling determination of the substitution site (nucleobase *versus* phosphate *versus* ribose) are indicated with diamonds (◇) and their proposed structures are depicted.

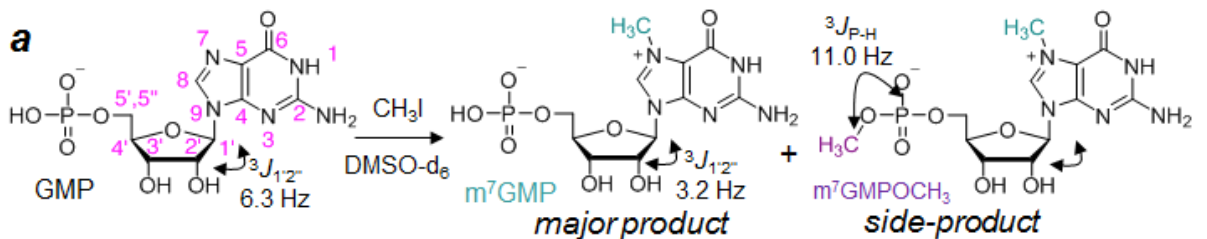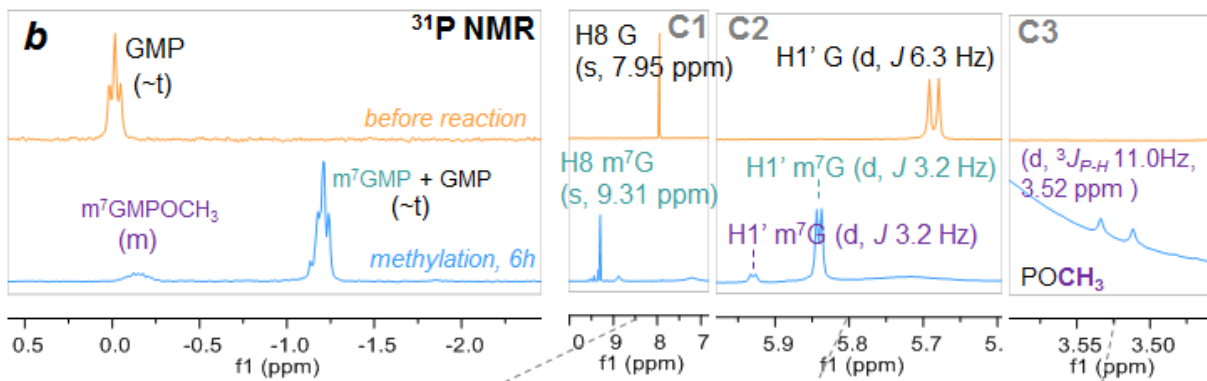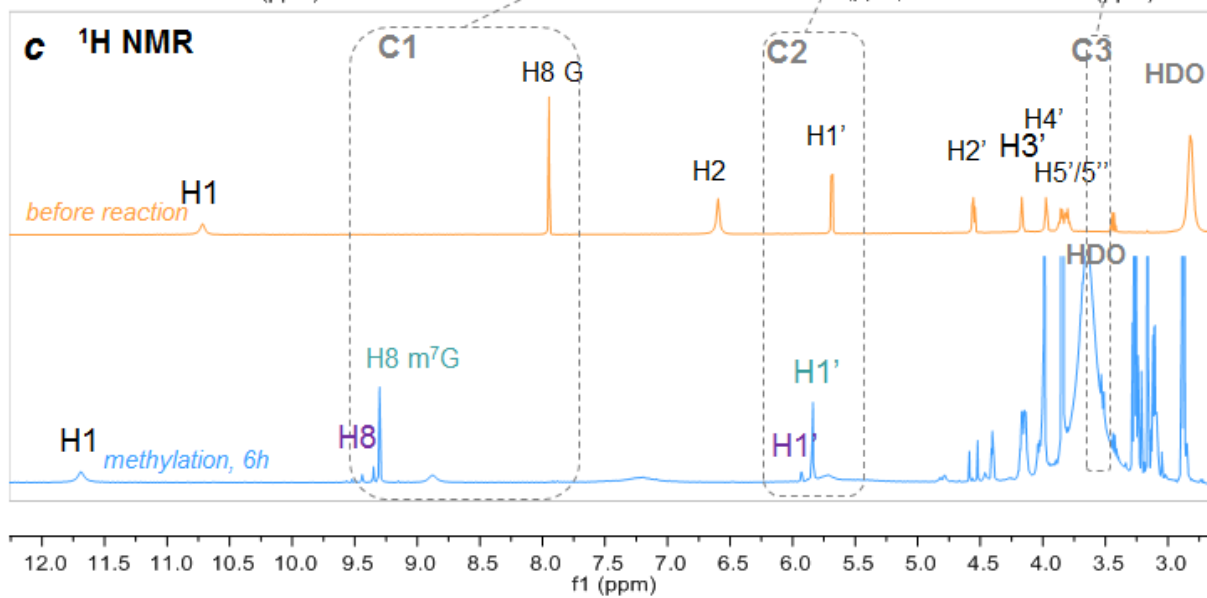

Fig. S10. **Analysis of GMP methylation reaction by  $^{31}\text{P}$  and  $^1\text{H}$  NMR.** A) Reaction scheme proposed based on HPLC and ESI (-) MS/MS analysis (Fig. 7, main manuscript); B) Analysis of reaction progress by  $^{31}\text{P}$  NMR – indicated are signals crucial for structure confirmation; C) Analysis of reaction progress by  $^1\text{H}$  NMR – indicated are signals crucial for structure confirmation.

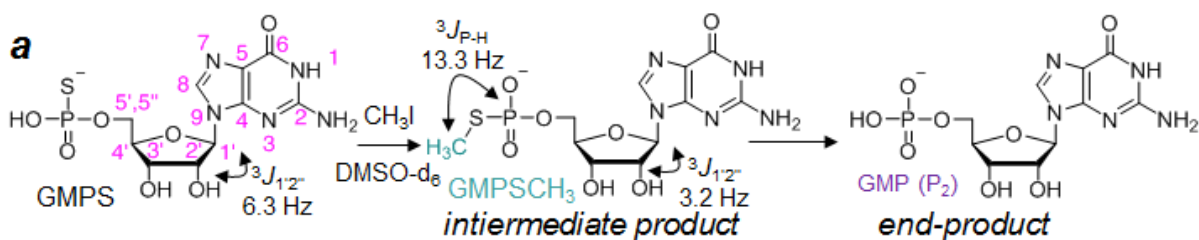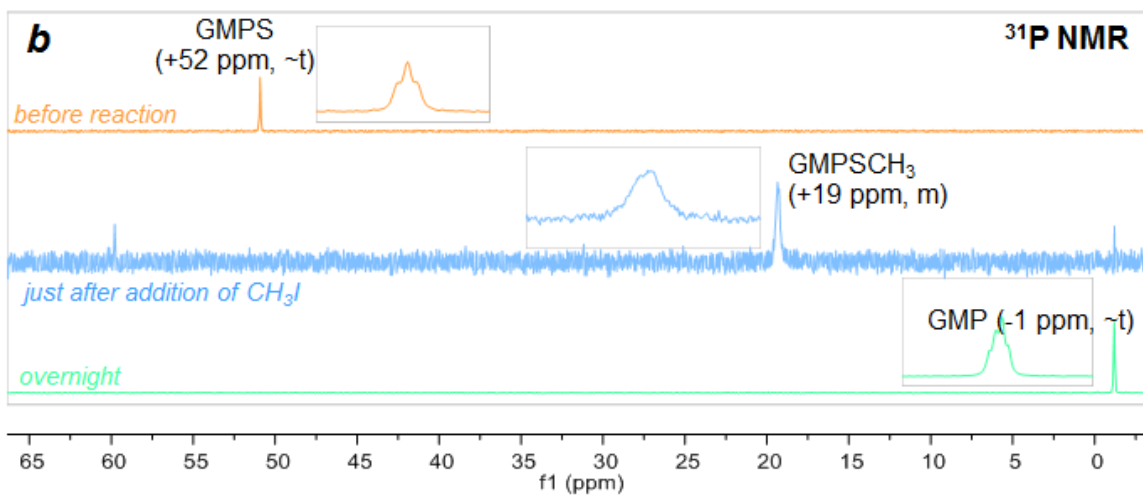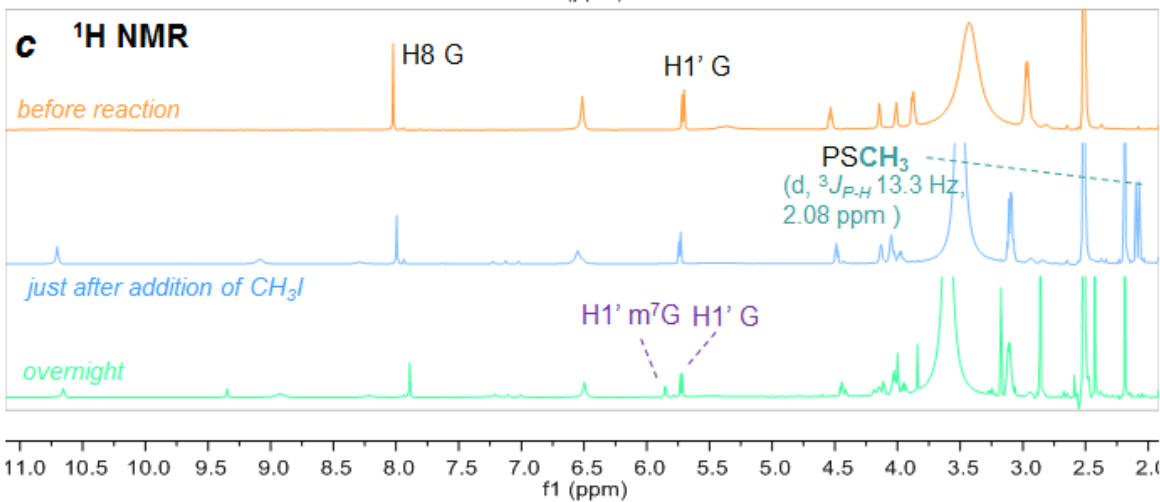

Fig. S11. **Analysis of GMPS methylation reaction by <sup>31</sup>P and <sup>1</sup>H NMR.** A) reaction scheme proposed based on HPLC and ESI (-) MS/MS analysis (Fig. 7, main manuscript); B) Analysis of reaction progress by <sup>31</sup>P NMR – indicated are signals crucial for structure confirmation; C) Analysis of reaction progress by <sup>1</sup>H NMR – indicated are signals crucial for structure confirmation.

Table S1. Names and structures of investigated compounds.

| Nr | Abbreviation | Name                                    | Structure                                                                            | M   | Flow rate<br>μl/min | Concentration<br>μM | Ref. <sup>a</sup>          |
|----|--------------|-----------------------------------------|--------------------------------------------------------------------------------------|-----|---------------------|---------------------|----------------------------|
| 1. | ddCMP        | 2',3'-dideoxycytidine 5'-monophosphate  | 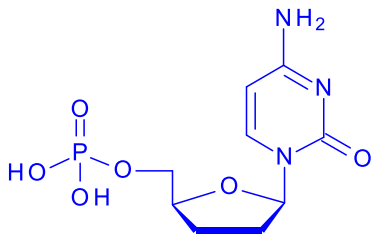   | 291 | 10                  | 100                 | (YOSHIKAW. M et al., 1967) |
| 2. | 2'-dCMPF     | 2'-deoxycytidine 5'-fluoromonophosphate |    | 309 | 10                  | 100                 | (Baranowski et al., 2015)  |
| 3. | CMP          | Cytidine 5'-monophosphate               |   | 323 | 10                  | 100                 | (YOSHIKAW. M et al., 1967) |
| 4. | UMP          | Uridine 5'-monophosphate                |  | 324 | 10                  | 100                 | (YOSHIKAW. M et al., 1967) |
| 5. | CMPF         | Cytidine 5'-fluoromonophosphate         |  | 325 | 20                  | 150                 | (Baranowski et al., 2015)  |
| 6. | UMPF         | Uridine 5'-fluoromonophosphate          |  | 326 | 20                  | 100                 | (Baranowski et al., 2015)  |

|     |                                                        |                                                                          |                                                                                      |     |     |     |                                  |
|-----|--------------------------------------------------------|--------------------------------------------------------------------------|--------------------------------------------------------------------------------------|-----|-----|-----|----------------------------------|
| 7.  | 3'-dAMP                                                | 3'-deoxyadenosine 5'-monophosphate                                       | 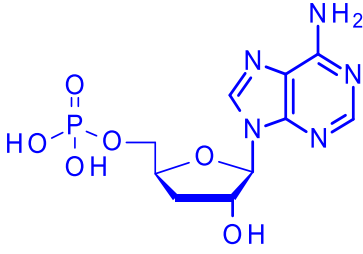   | 331 | 20  | 30  | Commercial<br>(Sigma<br>Aldrich) |
| 8.  | 2'-dAMP                                                | 2'-deoxyadenosine 5'-monophosphate                                       |    | 331 | 50  | 100 | Commercial<br>(Sigma<br>Aldrich) |
| 9.  | [ <sup>18</sup> O, <sup>18</sup> O] <sub>2</sub> -dAMP | 2'-deoxyadenosine 5'-([ <sup>18</sup> O, <sup>18</sup> O]-monophosphate) |    | 335 | 100 | 100 | Experimental                     |
| 10. | UMPS                                                   | Uridine 5'-thiomonophosphate                                             |  | 340 | 100 | 100 | (Kowalska et al., 2008)          |
| 11. | AMPαBH <sub>3</sub>                                    | Adenosine 5'-boranomonomophosphate                                       |  | 345 | 10  | 100 | (Kowalska et al., 2014)          |
| 12. | AMPNH <sub>2</sub>                                     | Adenosine 5'-amidophosphate                                              |  | 346 | 10  | 150 | Experimental                     |

|     |                               |                                              |                                                                                      |     |     |     |                            |
|-----|-------------------------------|----------------------------------------------|--------------------------------------------------------------------------------------|-----|-----|-----|----------------------------|
| 13. | 5'-AMP, AMP                   | Adenosine 5'-monophosphate                   | 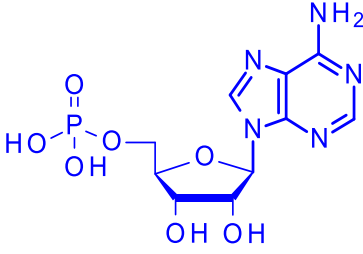   | 347 | 20  | 50  | Commercial (Sigma-Aldrich) |
| 14. | 3'-AMP                        | Adenosine 3'-monophosphate                   |    | 347 | 100 | 100 | Commercial (Sigma Aldrich) |
| 15. | AMPF $\alpha$ BH <sub>3</sub> | Adenosine 5'-fluoroboranomonomophosphate     |   | 347 | 20  | 50  | (Baranowski et al., 2015)  |
| 16. | GMPH                          | Guanosine 5'-H-phosphonate                   |  | 347 | 20  | 50  | (Strenkowska et al., 2012) |
| 17. | AZTMP                         | 3'-azido-3'-deoxythymidine 5'-monophosphate  |  | 347 | 10  | 50  | (YOSHIKAW. M et al., 1967) |
| 18. | 2'-F, 2'-dAMP                 | 2'-fluoro-2'-deoxyadenosine 5'-monophosphate |  | 349 | 50  | 100 | Experimental               |

|     |                                                  |                                                                                 |                                                                                      |     |     |     |                           |
|-----|--------------------------------------------------|---------------------------------------------------------------------------------|--------------------------------------------------------------------------------------|-----|-----|-----|---------------------------|
| 19. | AMPF                                             | Adenosine 5'-fluoromonophosphate                                                | 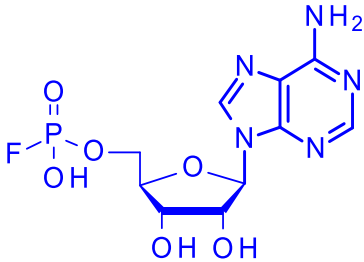   | 349 | 100 | 50  | (Baranowski et al., 2015) |
| 20. | [ <sup>18</sup> O] AMP                           | Adenosine 5'-([ <sup>18</sup> O]-monophosphate)                                 |    | 349 | 100 | 100 | Experimental              |
| 21. | [ <sup>18</sup> O, <sup>18</sup> O]AMP           | Adenosine 5'- ([ <sup>18</sup> O, <sup>18</sup> O]-monophosphate)               |   | 351 | 100 | 100 | Experimental              |
| 22. | [ <sup>18</sup> O, <sup>18</sup> O]2'-F, 2'-dAMP | 2'-fluoro-2'-deoxyadenosine ([ <sup>18</sup> O, <sup>18</sup> O]-monophosphate) |  | 353 | 50  | 100 | Experimental              |
| 23. | GMP(NH <sub>2</sub> ) <sub>2</sub>               | Guanosine 5'-phosphorodiamidate                                                 |  | 361 | 10  | 50  | Experimental              |
| 24. | GMPBH <sub>3</sub>                               | Guanosine 5'-boranophosphate                                                    |  | 361 | 10  | 100 | (Kowalska et al., 2014)   |
| 25. | GMPNH <sub>2</sub>                               | Guanosine 5'-amidophosphate                                                     |  | 362 | 100 | 50  | Experimental              |



|     |                              |                                                    |                                                                                      |     |     |     |                            |
|-----|------------------------------|----------------------------------------------------|--------------------------------------------------------------------------------------|-----|-----|-----|----------------------------|
| 26. | 2'-NH <sub>2</sub> , 2'-dGMP | 2'-amino-2'-deoxyguanosine 5'-monophosphate        | 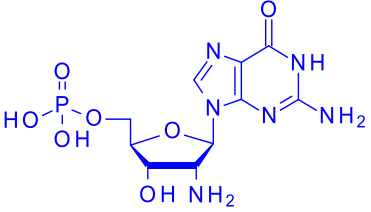   | 362 | 70  | 30  | (Jemielity et al., 2012)   |
| 27. | 3'NH <sub>2</sub> GMP        | 3'-amino-3'-deoxyguanosine 5'-monophosphate        |    | 362 | 50  | 50  | Experimental               |
| 28. | AMPS                         | Adenosine 5'-thiomonophosphate                     |    | 363 | 20  | 50  | (Kowalska et al., 2008)    |
| 29. | GMP                          | Guanosine 5'-monophosphate                         |   | 363 | 100 | 100 | Commercial (Sigma-Aldrich) |
| 30. | [ <sup>18</sup> O]AMPS       | adenosine 5'-([ <sup>18</sup> O]thiomonophosphate) |  | 365 | 100 | 50  | Experimental               |
| 31. | GMFP                         | Guanosine 5'-fluoromonophosphate                   |  | 365 | 10  | 100 | (Baranowski et al., 2015)  |

|     |                                                           |                                                                                   |                                                                                      |     |     |     |                          |
|-----|-----------------------------------------------------------|-----------------------------------------------------------------------------------|--------------------------------------------------------------------------------------|-----|-----|-----|--------------------------|
| 32. | [ <sup>18</sup> O, <sup>18</sup> O]3' <sup>NH</sup> 2 GMP | 3'-amino-3'-deoxyguanosine 5'-([ <sup>18</sup> O, <sup>18</sup> O]-monophosphate) | 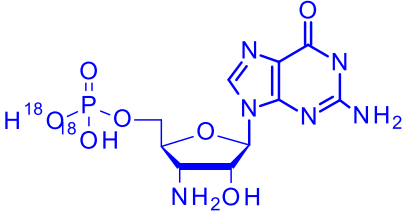   | 366 | 70  | 30  | Experimental             |
| 33. | [[ <sup>18</sup> O, <sup>18</sup> O] AMPS                 | Adenosine 5'-tiomonophosphate <sup>18</sup> O isotope                             |    | 367 | 100 | 100 | Experimental             |
| 34. | CO-GMPH                                                   | 2',3'-O,O-carbonyl-guanosine 5'-H-phosphonate                                     |    | 373 | 20  | 50  | Experimental             |
| 35. | m <sup>7</sup> GMPNH <sub>2</sub>                         | N <sup>7</sup> -methylguanosine 5'-amidophosphate                                 |  | 376 | 30  | 50  | Experimental             |
| 36. | 2'-NH <sub>2</sub> , 2'-d m <sup>7</sup> GMP              | 2'-amino-2'-deoxy-7-methylguanosine 5'-monophosphate                              |  | 376 | 50  | 50  | (Jemielity et al., 2012) |
| 37. | m <sup>7</sup> GMP                                        | N <sup>7</sup> -methylguanosine 5'-monophosphate                                  |  | 377 | 10  | 30  | (Jemielity et al., 2003) |

|     |                  |                                               |                                                                                      |     |     |     |                                 |
|-----|------------------|-----------------------------------------------|--------------------------------------------------------------------------------------|-----|-----|-----|---------------------------------|
| 38. | $m^{2-O}GMP$     | 2'-O-methylguanosine 5'-monophosphate         | 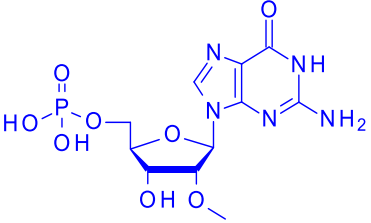   | 377 | 100 | 50  | (Jemielity et al., 2003)        |
| 39. | 3'-OMeGMP        | 3'-O-methylguanosine 5'-monophosphate         |    | 377 | 100 | 50  | (Stepinski et al., 2001)        |
| 40. | GMPS             | Guanosine 5'-thiomonophosphate                |    | 379 | 20  | 100 | (Kowalska et al., 2008)         |
| 41. | GMSP             | Guanosine 5'-phosphorothiolate                |   | 379 | 10  | 100 | Wojtczak et. al. in preparation |
| 42. | 2'-dCDP          | 2'-deoxycytidine 5'-diphosphate               |  | 387 | 10  | 100 | Commercial (Sigma Aldrich)      |
| 43. | $m_2^{7,2-O}GMP$ | N7,2'-O-dimethylguanosine                     |  | 391 | 10  | 50  | (Jemielity et al., 2003)        |
| 44. | $m^7GMPOCH_3$    | N7-methylguanosine 5'-(O-methyl)monophosphate |  | 391 | 100 | 100 | (Jemielity et al., 2003)        |

|     |                                       |                                                   |                                                                                      |     |    |     |                               |
|-----|---------------------------------------|---------------------------------------------------|--------------------------------------------------------------------------------------|-----|----|-----|-------------------------------|
| 45. | m <sup>7</sup> GMPSNH <sub>2</sub> D1 | N7-methylguanosine 5'-phosphorothioamidate        | 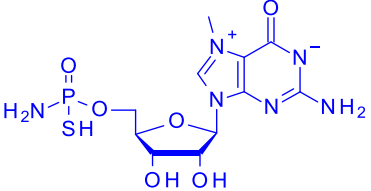   | 392 | 10 | 30  | Kopcial et al. in preparation |
| 46. | GMPSCH <sub>3</sub>                   | Guanosine 5'-O-(S-methyl)thiomonophosphate        |    | 393 | 10 | 100 | (Kowalska et al., 2009)       |
| 47. | m <sup>7</sup> GMPS                   | N7-methylguanosine 5'-thiomonophosphate           |    | 393 | 10 | 50  | (Kowalska et al., 2008)       |
| 48. | GMPNH <sub>2</sub> CH <sub>2</sub> CH | N-propargyl guanosine 5'-phosphoroamidate         |   | 400 | 10 | 100 | (Walczak et al., 2017)        |
| 49. | iPr-GMP                               | 2',3'-O,O-isopropylidenguanosine 5'-monophosphate |  | 403 | 30 | 100 | (Warminski et al., 2013)      |
| 50. | CDP                                   | Cytidine 5'-diphosphate                           |  | 403 | 20 | 50  | Commercial (Sigma Aldrich)    |
| 51. | UDP                                   | Uridine 5'-diphosphate                            |  | 404 | 10 | 100 | Commercial (Sigma Aldrich)    |

|     |                                               |                                                      |                                                                                      |     |     |     |                            |
|-----|-----------------------------------------------|------------------------------------------------------|--------------------------------------------------------------------------------------|-----|-----|-----|----------------------------|
| 52. | $m^{2,7,2'}$ - $^{\circ}$ GMPOCH <sub>3</sub> | N7,2'-O-dimethylguanosine 5'-(O-methyl)monophosphate | 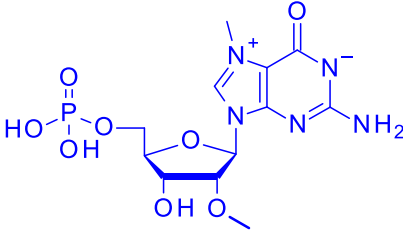   | 405 | 20  | 50  | Experimental               |
| 53. | AMP-N6-etSH                                   | N6-(2-mercaptoethyl)adenosine 5'-monophosphate       |    | 407 | 20  | 100 | (Szczepaniak et al., 2012) |
| 54. | m7GMPSCH3                                     | N7-methylguanosine 5'-(S-methyl)monothiophosphate    |    | 407 | 20  | 50  | Experimental               |
| 55. | cPAP                                          | 2',3'-cyclophosphoadenosine 5'-phosphate             |    | 409 | 10  | 50  | (Kowalska et al., 2012)    |
| 56. | 2'-O-pentynyl AMP                             | 2'-O-(5-pentynyl)adenosine 5'-monophosphate          |  | 413 | 100 | 100 | (Jawalekar et al., 2008)   |
| 57. | GMP-Im                                        | Guanosine 5'-phosphorimidazole                       |  | 413 | 20  | 50  | (Jemielity et al., 2003)   |

|     |                                           |                                                    |                                                                                      |     |     |     |                            |
|-----|-------------------------------------------|----------------------------------------------------|--------------------------------------------------------------------------------------|-----|-----|-----|----------------------------|
| 58. | $m^7\text{GMPNH}_2\text{C H}_2\text{CCH}$ | N-propargyl N7-methylguanosine 5'-phosphoroamidate | 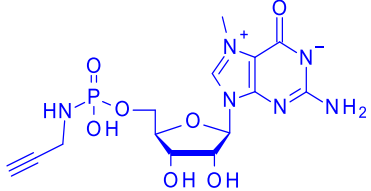   | 414 | 50  | 50  | (Walczak et al., 2017)     |
| 59. | AMP-N6-BDA                                | N6-(4-aminobutyl)adenosine 5'-monophosphate        |    | 418 | 20  | 100 | (Szczepaniak et al., 2012) |
| 60. | ADP $\alpha\text{BH}_3$ D1                | Adenosine 5'-O-(1-boranodiphosphate)               |    | 425 | 10  | 100 | (Strenkowska et al., 2012) |
| 61. | ADP $\alpha\text{BH}_3$ D2                | Adenosine 5'-O-(1-boranodiphosphate)               |    | 425 | 10  | 100 | (Strenkowska et al., 2012) |
| 62. | ApCH <sub>2</sub> p                       | Adenosine 5'-O-methylenediphosphate                |   | 425 | 10  | 50  | (Kalek et al., 2005)       |
| 63. | ApNHp                                     | Adenosine 5'-O-imidodiphosphate                    |  | 426 | 20  | 100 | (Rydzik et al., 2012)      |
| 64. | $m^7\text{GMP-Im}$                        | N7-methylguanosine 5'-phosphorimidazolid           |  | 427 | 10  | 50  | (Jemielity et al., 2003)   |
| 65. | ADP                                       | Adenosine 5'-diphosphate                           |  | 427 | 100 | 50  | Commercial (Sigma Aldrich) |

|     |                                                                   |                                                          |                                                                                      |     |     |     |                           |
|-----|-------------------------------------------------------------------|----------------------------------------------------------|--------------------------------------------------------------------------------------|-----|-----|-----|---------------------------|
| 66. | APS                                                               | Adenosine 5'-phosphosulfate                              | 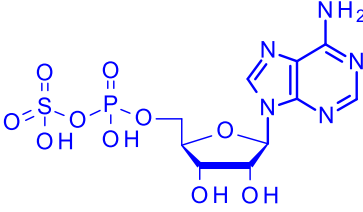   | 427 | 100 | 50  | (Kowalska et al., 2012)   |
| 67. | ApCH2pF                                                           | Adenosine 5'-(2-Fluoro-1,2-methylenediphosphate)         |    | 427 | 100 | 100 | (Baranowski et al., 2015) |
| 68. | 2'-F 2'-dApCH2p                                                   | 2'-fluoro-2'-deoxyadenosine 5'-bisphosphonate            |    | 427 | 30  | 50  | Experimental              |
| 69. | [ <sup>18</sup> O] ApCH2p                                         | Adenosine 5'-O-(β[ <sup>18</sup> O]methylenediphosphate) |   | 427 | 10  | 100 | Experimental              |
| 70. | ADPF                                                              | Adenosine 5'-(2-fluorodiphosphate)                       |  | 429 | 20  | 50  | (Baranowski et al., 2015) |
| 71. | 2'-F-2'-d ADP                                                     | 2'-fluoro-2'-deoxyadenosine 5'-(3-fluorodiphosphate)     |  | 429 | 20  | 100 | Experimental              |
| 72. | GMPNHC <sub>2</sub> H <sub>4</sub> N <sub>3</sub>                 | N-(2-azidoethyl) guanosine 5'-phosphoramidate            |  | 431 | 20  | 100 | (Walczak et al., 2017)    |
| 73. | GMPNH <sub>2</sub> (CH <sub>2</sub> ) <sub>4</sub> N <sub>3</sub> | N-(4-aminobutyl) guanosine 5'-phosphoramidate            |  | 433 | 50  | 70  | (Walczak et al., 2017)    |

|     |                         |                                             |                                                                                      |     |     |     |                            |
|-----|-------------------------|---------------------------------------------|--------------------------------------------------------------------------------------|-----|-----|-----|----------------------------|
| 74. | GpCH <sub>2</sub> p     | Guanosine 5'-O-methylenediphosphate         | 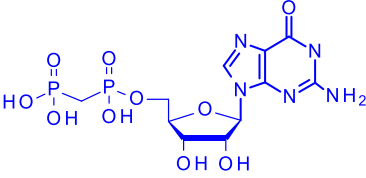   | 441 | 10  | 100 | (Kalek et al., 2006)       |
| 75. | m <sup>7</sup> GppH     | 7-methylguanosine 5'-diphosphate            |    | 441 | 20  | 100 | Experimental               |
| 76. | GpNHp                   | Guanosine 5'-O-imidodiphosphate             |    | 442 | 100 | 50  | (TOMASZ et al., 1988)      |
| 77. | ADPαS                   | Adenosine 5'-(1-thiodiphosphate)            |    | 443 | 100 | 50  | (Strenkowska et al., 2012) |
| 78. | ADPβS                   | Adenosine 5'-(2-thiodiphosphate)            |   | 443 | 10  | 100 | (Kowalska et al., 2007)    |
| 79. | GDP                     | Guanosine 5'-diphosphate                    |  | 443 | 100 | 180 | Commercial (Sigma Aldrich) |
| 80. | GpBH <sub>3</sub> pF_D1 | Guanosine 5'-(2-Fluoro-1-boranodiphosphate) |  | 443 | 10  | 100 | (Baranowski et al., 2015)  |
| 81. | GpBH <sub>3</sub> pF_D2 | Guanosine 5'-(2-Fluoro-1-boranodiphosphate) |  | 443 | 50  | 100 | (Baranowski et al., 2015)  |



|     |                       |                                                  |                                                                                      |     |     |     |                                        |
|-----|-----------------------|--------------------------------------------------|--------------------------------------------------------------------------------------|-----|-----|-----|----------------------------------------|
| 82. | GpCH <sub>2</sub> pF  | Guanosine 5'-(2-Fluoro-1,2-methylenediphosphate) | 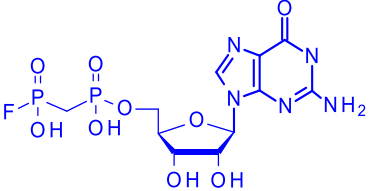   | 443 | 10  | 50  | (Baranowski et al., 2015)              |
| 83. | dGDPS                 | 2-deoxyguanosine 5'-(2-thiodiphosphate)          |    | 443 | 30  | 50  | Experimental + (Kowalska et al., 2007) |
| 84. | GpNHpF                | Guanosine 5'-(2-Fluoro-1,2-imidodiphosphate)     |    | 444 | 100 | 30  | (Baranowski et al., 2015)              |
| 85. | GDPF                  | Guanosine 5'-Fluorodiphosphate                   |    | 445 | 50  | 100 | (Baranowski et al., 2015)              |
| 86. | [ <sup>18</sup> O]GDP | Guanosine 5'-(β[ <sup>18</sup> O]-diphosphate)   |  | 445 | 10  | 100 | Experimental                           |
| 87. | AMP-N6-HMDA           | N6-(6-aminohexyl)adenosine 5'-monophosphate      |  | 446 | 10  | 50  | (Szczepaniak et al., 2012)             |
| 88. | GppC <sub>2</sub> H   | β-C-(2-ethynyl)guanosine diphosphate             |  | 451 | 20  | 50  | (Wanat et al., 2015)                   |
| 89. | bn <sup>7</sup> GMP   | N7-benzylguanosine 5'-monophosphate              |  | 453 | 20  | 30  | (Grudzien et al., 2004)                |

|     |                                    |                                                      |                                                                                      |     |     |     |                           |
|-----|------------------------------------|------------------------------------------------------|--------------------------------------------------------------------------------------|-----|-----|-----|---------------------------|
| 90. | m <sup>7</sup> GDPαBH <sub>3</sub> | 7-methylguanosine 5'-(1-boranodiphosphate)           | 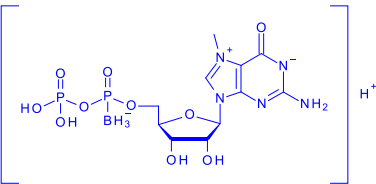   | 455 | 10  | 100 | (Kowalska et al., 2014)   |
| 91. | m <sup>7</sup> GpCH <sub>2</sub> p | 7-methylguanosine 5'-methylenebis(phosphate)         |    | 455 | 20  | 50  | (Kalek et al., 2005)      |
| 92. | m <sup>7</sup> GDP                 | 7-methylguanosine 5'-diphosphate                     |    | 457 | 10  | 30  | (Jemielity et al., 2003)  |
| 93. | m <sup>7</sup> GPS                 | 7-methylguanosine 5'-phosphosulfate                  |    | 457 | 100 | 100 | (Kowalska et al., 2012)   |
| 94. | m <sup>7</sup> GpNHpF              | 7-methylguanosine 5'-(2-fluoro-1,2-imidodiphosphate) |  | 458 | 10  | 30  | (Baranowski et al., 2015) |
| 95. | cPAP-Im                            | 2',3'-cyclophosphoadenosine 5'-phosphorimidazole     |  | 459 | 10  | 100 | (Kowalska et al., 2012)   |
| 96. | GDPβS                              | Guanosine 5'-(2-thiodiphosphate)                     |  | 459 | 20  | 50  | (Kowalska et al., 2007)   |
| 97. | m <sup>7</sup> GDPF                | 7-methylguanosine 5'-fluorodiphosphate               |  | 459 | 10  | 50  | (Baranowski et al., 2015) |

|     |                                  |                                                                            |                                                                                      |     |     |     |                            |
|-----|----------------------------------|----------------------------------------------------------------------------|--------------------------------------------------------------------------------------|-----|-----|-----|----------------------------|
| 98. | GpSpF_D1                         | Guanosine 5'-(2-Fluoro-1-thiodiphosphate)                                  | 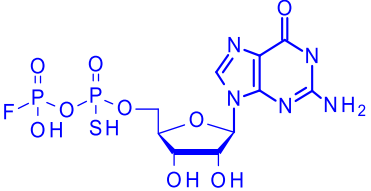   | 461 | 100 | 100 | (Baranowski et al., 2015)  |
| 99. | GpSpF_D2                         | Guanosine 5'-(2-Fluoro-1-thiodiphosphate)                                  |    | 461 | 100 | 100 | (Baranowski et al., 2015)  |
| 100 | GppC <sub>3</sub> H <sub>3</sub> | $\beta$ -C-(2-propargyl) guanosine diphosphate                             |    | 465 | 10  | 100 | (Wanat et al., 2015)       |
| 101 | 2'-dCTP                          | 2'deoxyctidine 5'-triphosphate                                             |    | 467 | 20  | 150 | Commercial (Sigma Aldrich) |
| 102 | DMGpNHp                          | <i>N,N</i> -dimethylguanosine 5'-imidodiphosphate                          |  | 470 | 10  | 30  | (Zytek et al., 2014)       |
| 103 | 2'-O-MCE-N <sub>3</sub> AMP-     | 2'-O-( <i>N</i> -(2-Azidoethyl)carbamoyl) methyladenosine 5'-monophosphate |  | 473 | 20  | 50  | (Wojtczak et al., 2016)    |
| 104 | m <sup>7</sup> GDPαS D1          | <i>N</i> 7 -methylguanosine 5'-O-(1-thiodiphosphate)                       |  | 473 | 10  | 50  | (Strenkowska et al., 2012) |

|     |                                    |                                                   |                                                                                      |     |     |     |                            |
|-----|------------------------------------|---------------------------------------------------|--------------------------------------------------------------------------------------|-----|-----|-----|----------------------------|
| 105 | m <sup>7</sup> GDPαS D2            | N 7 -methylguanosine 5'-O-(1-thiodiphosphate)     | 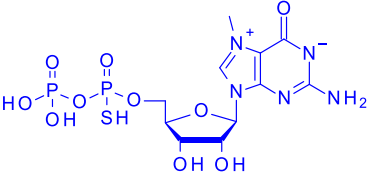   | 473 | 10  | 50  | (Strenkowska et al., 2012) |
| 106 | ApBH <sub>3</sub> plm              | Adenosine 5 -(1-borano-2-imidazolyl-diphosphate), |    | 475 | 100 | 100 | (Kowalska et al., 2014)    |
| 107 | GppC <sub>4</sub> H <sub>5</sub>   | guanosine 5'- [2-C-(3-butynyl)diphosphate]        |    | 479 | 20  | 100 | (Wanat et al., 2015)       |
| 108 | m7GppC <sub>3</sub> H <sub>3</sub> | β-C-(2-propargyl) 7-methylguanosine diphosphate   |    | 479 | 10  | 100 | (Walczak et al., 2017)     |
| 109 | AppEtCN                            | Adenosine 5'-[(2-O-cyanoethyl)diphosphate ]       |   | 480 | 50  | 50  | (Strenkowska et al., 2012) |
| 110 | GppNHC <sub>3</sub> H <sub>3</sub> | Guanosine 5'-(N2-propargyl-2-amino)diphosphate    |  | 480 | 20  | 50  | (Walczak et al., 2017)     |
| 111 | GppOC <sub>3</sub> H <sub>3</sub>  | Guanosine 5'-(2-propargyl)diphosphate             |  | 481 | 20  | 50  | (Walczak et al., 2017)     |
| 112 | AMP-NH-etS-S-etNH <sub>2</sub>     | N6-cystamine-adenosine 5'-monophosphate           |  | 482 | 20  | 70  | (Szczepaniak et al., 2012) |
| 113 | AMPIm-6-GABA                       | N6-(4-carboxybutyl)-adenosine 5'-monophosphate    |  | 483 | 50  | 100 | (Szczepaniak et al., 2012) |

|     |                        |                                                               |                                                                                      |     |     |     |                            |
|-----|------------------------|---------------------------------------------------------------|--------------------------------------------------------------------------------------|-----|-----|-----|----------------------------|
| 114 | CTP                    | Cytidine 5'-triphosphate                                      | 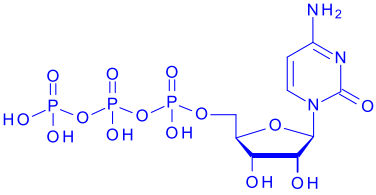   | 483 | 20  | 100 | Commercial (Sigma Aldrich) |
| 115 | UTP                    | Uridine 5'-triphosphate                                       |    | 484 | 20  | 100 | Commercial (Sigma Aldrich) |
| 116 | m <sup>7</sup> ,2GDPβS | N <sup>7</sup> ,2'-O-dimethylguanosine 5'-(2-thiodiphosphate) |    | 487 | 100 | 30  | (Kowalska et al., 2007)    |
| 117 | cPAPS                  | 2',3'-cyclophosphoadenosine 5'-phosphosulfate                 |   | 489 | 100 | 100 | (Kowalska et al., 2012)    |
| 118 | ADPβSe                 | Adenosine 5'-(2-selenodiphosphate)                            |  | 491 | 10  | 50  | (Kowalska et al., 2009)    |
| 119 | GpNHplm                | Guanosine 5'-(2-Imidazolyl-1,2-imidodiphosphate)              |  | 492 | 30  | 30  | (Baranowski et al., 2015)  |
| 120 | m7GppC4H5              | β-C-(3-butynyl) 7-methylguanosine diphosphate                 |  | 493 | 10  | 100 | (Walczak et al., 2017)     |
| 121 | m7GppNHC3H3            | 7-methylguanosine 5'-(N2-propargyl-2-amino)diphosphate        |  | 494 | 20  | 30  | (Walczak et al., 2017)     |

|     |          |                                                   |                                                                                      |     |     |     |                            |
|-----|----------|---------------------------------------------------|--------------------------------------------------------------------------------------|-----|-----|-----|----------------------------|
| 122 | GDP-EtCN | Guanosine 5'-[(2-O-cyanoethyl)diphosphate]        | 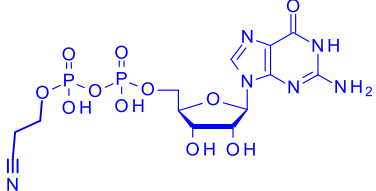   | 496 | 20  | 100 | (Strenkowska et al., 2012) |
| 123 | ATPβBH3  | Adenosine 5'-O-(2-boranotriphosphate)             |    | 505 | 100 | 100 | (Strenkowska et al., 2012) |
| 124 | ApCH2pp  | Adenosine 5'-O-(1,2-methylenetriphosphate)        |    | 505 | 20  | 100 | (Spelta et al., 2003)      |
| 125 | AppCH2p  | Adenosine 5'-O-(2,3-methylenetriphosphate)        |    | 505 | 100 | 50  | (Guranowski et al., 2006)  |
| 126 | GDPβSe   | Guanosine 5'-(2-selenodiphosphate)                |   | 507 | 10  | 100 | (Kowalska et al., 2009)    |
| 127 | ATP      | Adenosine 5'-triphosphate                         |  | 507 | 20  | 100 | Commercial (Sigma Aldrich) |
| 128 | ApCH2ppF | Adenosine 5'-(3-Fluoro-1,2-methylenetriphosphate) |  | 507 | 20  | 100 | (Baranowski et al., 2015)  |
| 129 | APPS     | adenosine 5'-diphosphosulfate                     |  | 507 | 20  | 100 | (Kowalska et al., 2012)    |

|     |                      |                                                        |                                                                                      |     |     |     |                            |
|-----|----------------------|--------------------------------------------------------|--------------------------------------------------------------------------------------|-----|-----|-----|----------------------------|
| 130 | ATPF                 | Adenosine 5'-(3-Fluorotriphosphate)                    | 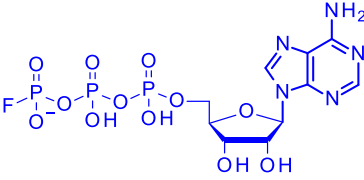   | 509 | 20  | 50  | (Baranowski et al., 2015)  |
| 131 | 2'-F-2'-d ATP        | 2'-fluoro-2'-deoxyadenosine 5'-(3-Fluorotriphosphate)  |    | 509 | 100 | 100 | Experimental               |
| 132 | cPADPF               | 2',3'-Cyclic-phosphoadenosine 5'-(2-Fluorodiphosphate) |    | 509 | 100 | 100 | (Baranowski et al., 2015)  |
| 133 | m7GMPTA              | 7-methylguanosine 5'-(tryptaminophosphate)             |   | 519 | 20  | 50  | (Guranowski et al., 2011)  |
| 134 | GTPβBH <sub>3</sub>  | Guanosine 5'-O-(2-boranotriphosphate)                  |  | 521 | 10  | 50  | (Strenkowska et al., 2012) |
| 135 | GpCH <sub>2</sub> pp | Guanosine 5'-O-(1,2-methylenetriphosphate)             |  | 521 | 10  | 50  | (Strenkowska et al., 2012) |
| 136 | GppCH <sub>2</sub> p | Guanosine 5'-O-(2,3-methylenetriphosphate)             |  | 521 | 10  | 150 | (Rydzik et al., 2009)      |

|     |                       |                                                     |  |     |     |     |                            |
|-----|-----------------------|-----------------------------------------------------|--|-----|-----|-----|----------------------------|
| 137 | GTP                   | Guanosine 5'-triphosphate                           |  | 523 | 100 | 100 | Commercial (Sigma Aldrich) |
| 138 | GpCH <sub>2</sub> ppF | Guanosine 5'-(2-Fluoro-1,2-methylenediphosphate)    |  | 523 | 20  | 50  | (Baranowski et al., 2015)  |
| 139 | GpBH <sub>3</sub> ppF | Guanosine 5'-(2-Fluoro-1-boranodiphosphate)         |  | 523 | 10  | 100 | (Baranowski et al., 2015)  |
| 140 | 3' (2') Mant-GMP      | 2'-/3'-Methylantraniloyl guanosine 5'-monophosphate |  | 524 | 100 | 100 | (Ziemniak et al., 2013)    |
| 141 | GpNHppF               | Guanosine 5'-(3-Fluoroimidotriphosphate)            |  | 524 | 20  | 50  | (Baranowski et al., 2015)  |
| 142 | ApSppF                | Adenosine 5'-(3-Fluoro-1-thiotriphosphate)          |  | 525 | 100 | 50  | (Baranowski et al., 2015)  |
| 143 | [ <sup>18</sup> O]GTP | Guanosine 5'-(γ[ <sup>18</sup> O]triphosphate)      |  | 525 | 10  | 100 | Experimental               |
| 144 | m7GppCH2p             | 7-methylguanosine 5'-O-(2,3-methylenetriphosphate)  |  | 535 | 10  | 100 | (Guranowski et al., 2006)  |



|     |                      |                                                             |                                                                                      |     |     |     |                                   |
|-----|----------------------|-------------------------------------------------------------|--------------------------------------------------------------------------------------|-----|-----|-----|-----------------------------------|
| 145 | m <sup>7</sup> GTP   | 7-methylguanosine 5'-triphosphate                           | 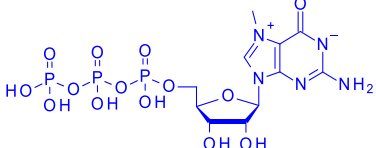   | 537 | 50  | 100 | (Jemielity et al., 2003)          |
| 146 | GpCH2ppS             | Guanosine 5'-(1,2-methylene-3-thiotriphosphate)             |    | 537 | 20  | 30  | (Strenkowska et al., 2012)        |
| 147 | GTPαS                | Guanosine 5'-(1-thiotriphosphate)                           |    | 539 | 10  | 80  | (Strenkowska et al., 2010)        |
| 148 | GTPβS                | Guanosine 5'-(2-thiotriphosphate)                           |    | 539 | 10  | 80  | (Strenkowska et al., 2012)        |
| 149 | GTPγS                | Guanosine 5'-(3-thiotriphosphate)                           |   | 539 | 10  | 80  | (Kowalska et al., 2007)           |
| 150 | GpppC3H3             | Guanosine 5'-[β-C-(2-propargyl)triphosphate]                |  | 545 | 20  | 100 | (Wanat et al., 2015)              |
| 151 | AMP-N6-TTDA          | 13-amino-4,7,10-Trioxa-decane-N6-adenosine 5'-monophosphate |  | 550 | 10  | 50  | (Szczepaniak et al., 2012)        |
| 152 | m <sup>7</sup> GTPγS | 7-methylguanosine 5'-(3-thiotriphosphate)                   |  | 553 | 100 | 30  | (Kowalska et al., 2007)           |
| 153 | m7GTPαS_D1           | 7-methylguanosine 5'-(1-thiotriphosphate)                   |  | 553 | 10  | 100 | (Kowalska et al., 2009)           |
| 154 | ADP-5-Rib            | Adenosine Diphosphate 5-D-Ribofuranose                      |  | 559 | 10  | 100 | (Dabrowski-Tumanski et al., 2013) |

|     |                                                    |                                                                   |                                                                                      |     |     |     |                                   |
|-----|----------------------------------------------------|-------------------------------------------------------------------|--------------------------------------------------------------------------------------|-----|-----|-----|-----------------------------------|
| 155 | GpppSC3H3                                          | S-(2-propargyl) guanosine 5'-(3-thiotriphosphate)                 | 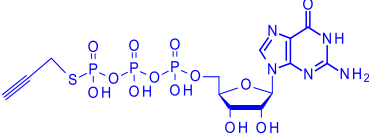   | 577 | 20  | 70  | (Walczak et al., 2017)            |
| 156 | Ant-m7 GDP                                         | 2'-/3'- Anthraniloyl 7-methylguanosine 5'-monophosphate           |    | 579 | 100 | 100 | (Ziemniak et al., 2013)           |
| 157 | GTPβSe                                             | Guanosine 5'-O-(2-selenotriphosphate)                             |    | 587 | 100 | 30  | (Strenkowska et al., 2012)        |
| 158 | ADP-6-Glc                                          | Adenosine Diphosphate 6-D-Glucopyranose                           |   | 589 | 50  | 30  | (Dabrowski-Tumanski et al., 2013) |
| 159 | GDP-1-β-Fuc                                        | Guanosine Diphosphate 1-β-L-Fucopyranose                          |  | 589 | 10  | 30  | (Dabrowski-Tumanski et al., 2013) |
| 160 | GpCH2ppSEt CN                                      | S-(2-cyanoethyl) guanosine 5'-(1,2-methylene-3-thio-triphosphate) |  | 590 | 100 | 100 | (Strenkowska et al., 2012)        |
| 161 | m <sup>7</sup> GpppSC <sub>3</sub> H <sub>3</sub>  | S-(2-propargyl) 7-methylguanosine 5'-(3-thiotriphosphate)         |  | 591 | 10  | 100 | (Walczak et al., 2017)            |
| 162 | GpppNHC <sub>2</sub> H <sub>4</sub> N <sub>3</sub> | N-(2-propargyl) guanosine 5'-(3-aminotriphosphate)                |  | 591 | 20  | 100 | (Walczak et al., 2017)            |
| 163 | m <sup>7</sup> GDPβTA                              | 7-methylguanosine 5'-(2-tryptaminodiphosphate)                    |  | 599 | 20  | 50  | (Guranowski et al., 2011)         |

|     |                                   |                                                              |                                                                                    |     |    |     |                                   |
|-----|-----------------------------------|--------------------------------------------------------------|------------------------------------------------------------------------------------|-----|----|-----|-----------------------------------|
| 164 | GpppCH2p                          | Guanosine 5'-O-(3,4-methylenetetrphoshate)                   | 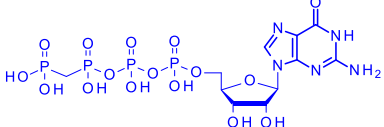 | 601 | 10 | 70  | (Guranowski et al., 2006)         |
| 165 | GDP-1- $\alpha$ -Glc              | Guanosine 5-Diphosphate 1- $\alpha$ -D-Glucopyranose         |  | 605 | 20 | 100 | (Dabrowski-Tumanski et al., 2013) |
| 166 | AppSepEtCN                        | adenosine 5'-[2-seleno-3-(2-O-cyanoetylo)triphosphate]       |  | 624 | 10 | 100 | (Strenkowska et al., 2012)        |
| 167 | GDP $\beta$ S-AcPy                | S-(1-acetylpyrenyl) guanosine 5'-(2-thiodiphosphate)         |  | 701 | 50 | 50  | (Kasprzyk et al., 2016)           |
| 168 | m <sup>7</sup> GDP $\beta$ S-AcPy | S-(1-acetylpyrenyl) 7-methylguanosine 5'-(2-thiodiphosphate) |  | 715 | 10 | 100 | (Kasprzyk et al., 2016)           |

<sup>a</sup>Baranowski, M., A. Nowicka, A. Rydzik, M. Warminski, R. Kasprzyk, B. Wojtczak, J. Wojcik, T. Claridge, J. Kowalska, and J. Jemielity, 2015, Synthesis of Fluorophosphate Nucleotide Analogues and Their Characterization as Tools for F-19 NMR Studies: *Journal of Organic Chemistry*, v. 80, p. 3982-3997.

Dabrowski-Tumanski, P., J. Kowalska, and J. Jemielity, 2013, Efficient and Rapid Synthesis of Nucleoside Diphosphate Sugars from Nucleoside Phosphorimidazolides: *European Journal of Organic Chemistry*, p. 2147-2154.

Grudzien, E., J. Stepinski, M. Jankowska-Anyszka, R. Stolarski, E. Darzynkiewicz, and R. Rhoads, 2004, Novel cap analogs for in vitro synthesis of mRNAs with high translational efficiency: *Rna-a Publication of the Rna Society*, v. 10, p. 1479-1487.

Guranowski, A., E. Starzynska, M. Pietrowska-Borek, J. Jemielity, J. Kowalska, E. Darzynkiewicz, M. Thompson, and G. Blackburn, 2006, Methylene analogues of adenosine 5'-tetrphosphate - Their chemical synthesis and recognition by human and plant mononucleoside tetrphosphatases and dinucleoside tetrphosphatases: *Febs Journal*, v. 273, p. 829-838.

Guranowski, A., A. Wojdyla, A. Rydzik, J. Stepinski, and J. Jemielity, 2011, Plant nucleoside 5'-phosphoramidate hydrolase; simple purification from yellow lupin (*Lupinus luteus*) seeds and properties of homogeneous enzyme: *Acta Biochimica Polonica*, v. 58, p. 131-136.

Jawalekar, A., N. Meeuwenoord, J. Cremers, H. Overkleeft, G. van der Marel, F. Rutjes, and F. van Delft, 2008, Conjugation of nucleosides and oligonucleotides by [3+2] cycloaddition: *Journal of Organic Chemistry*, v. 73, p. 287-290.

Jemielity, J., M. Lukaszewicz, J. Kowalska, J. Czarnecki, J. Zuberek, and E. Darzynkiewicz, 2012, Synthesis of biotin labelled cap analogue - incorporable into mRNA transcripts and promoting cap-dependent translation: *Organic & Biomolecular Chemistry*, v. 10, p. 8570-8574.

Jemielity, J., J. Stepinski, M. Jaremko, D. Haber, R. Stolarski, R. Rhoads, and E. Darzynkiewicz, 2003, Synthesis of novel mRNA 5' cap-analogues: Dinucleoside P-1, P-3-tri-, P-1, P-4-tetra-, and P-1, P-5-pentaphosphates: *Nucleosides Nucleotides & Nucleic Acids*, v. 22, p. 691-694.

Kalek, M., J. Jemielity, Z. Darzynkiewicz, E. Bojarska, J. Stepinski, R. Stolarski, R. Davis, and E. Darzynkiewicz, 2006, Enzymatically stable 5' mRNA cap analogs: Synthesis and binding studies with human DcpS decapping enzyme: *Bioorganic & Medicinal Chemistry*, v. 14, p. 3223-3230.

- Kalek, M., J. Jemielity, J. Stepinski, R. Stolarski, and E. Darzynkiewicz, 2005, A direct method for the synthesis of nucleoside 5'-methylenebis(phosphonate)s from nucleosides: *Tetrahedron Letters*, v. 46, p. 2417-2421.
- Kasprzyk, R., J. Kowalska, Z. Wieczorek, M. Szabelski, R. Stolarski, and J. Jemielity, 2016, Acetylpyrene-labelled 7-methylguanine nucleotides: unusual fluorescence properties and application to decapping scavenger activity monitoring: *Organic & Biomolecular Chemistry*, v. 14, p. 3863-3868.
- Kowalska, J., M. Lewdorowicz, E. Darzynkiewicz, and J. Jemielity, 2007, A simple and rapid synthesis of nucleotide analogues containing a phosphorothioate moiety at the terminal position of the phosphate chain: *Tetrahedron Letters*, v. 48, p. 5475-5479.
- Kowalska, J., M. Lewdorowicz, J. Zuberek, E. Grudzien-Nogalska, E. Bojarska, J. Stepinski, R. E. Rhoads, E. Darzynkiewicz, R. E. Davis, and J. Jemielity, 2008, Synthesis and characterization of mRNA cap analogs containing phosphorothioate substitutions that bind tightly to eIF4E and are resistant to the decapping pyrophosphatase DcpS: *RNA*, v. 14, p. 1119-1131.
- Kowalska, J., M. Lukaszewicz, J. Zuberek, M. Ziemniak, E. Darzynkiewicz, and J. Jemielity, 2009, Phosphorothioate analogs of m(7)GTP are enzymatically stable inhibitors of cap-dependent translation: *Bioorganic & Medicinal Chemistry Letters*, v. 19, p. 1921-1925.
- Kowalska, J., A. Osowniak, J. Zuberek, and J. Jemielity, 2012, Synthesis of nucleoside phosphosulfates: *Bioorganic & Medicinal Chemistry Letters*, v. 22, p. 3661-3664.
- Kowalska, J., A. Wypijewska del Nogal, Z. Darzynkiewicz, J. Buck, C. Nicola, A. Kuhn, M. Lukaszewicz, J. Zuberek, M. Strenkowska, M. Ziemniak, M. Maciejczyk, E. Bojarska, R. Rhoads, E. Darzynkiewicz, U. Sahin, and J. Jemielity, 2014, Synthesis, properties, and biological activity of boranophosphate analogs of the mRNA cap: versatile tools for manipulation of therapeutically relevant cap-dependent processes: *Nucleic Acids Research*, v. 42, p. 10245-10264.
- Rydzik, A., M. Kulis, M. Lukaszewicz, J. Kowalska, J. Zuberek, Z. Darzynkiewicz, E. Darzynkiewicz, and J. Jemielity, 2012, Synthesis and properties of mRNA cap analogs containing imidodiphosphate moiety-fairly mimicking natural cap structure, yet resistant to enzymatic hydrolysis: *Bioorganic & Medicinal Chemistry*, v. 20, p. 1699-1710.
- Rydzik, A., M. Lukaszewicz, J. Zuberek, J. Kowalska, Z. Darzynkiewicz, E. Darzynkiewicz, and J. Jemielity, 2009, Synthetic dinucleotide mRNA cap analogs with tetraphosphate 5',5' bridge containing methylenebis(phosphonate) modification: *Organic & Biomolecular Chemistry*, v. 7, p. 4763-4776.
- Spelta, V., A. Mekhalfia, D. Rejman, M. Thompson, G. Blackburn, and R. North, 2003, ATP analogues with modified phosphate chains and their selectivity for rat P2X(2) and P2X(2/3) receptors: *British Journal of Pharmacology*, v. 140, p. 1027-1034.
- Stepinski, J., C. Waddell, R. Stolarski, E. Darzynkiewicz, and R. Rhoads, 2001, Synthesis and properties of mRNAs containing the novel "anti-reverse" cap analogs 7-methyl(3'-O-methyl)GpppG and 7-methyl(3'-deoxy)GpppG: *Rna-a Publication of the Rna Society*, v. 7, p. 1486-1495.
- Strenkowska, M., J. Kowalska, M. Lukaszewicz, J. Zuberek, W. Su, R. Rhoads, E. Darzynkiewicz, and J. Jemielity, 2010, Towards mRNA with superior translational activity: synthesis and properties of ARCA tetraphosphates with single phosphorothioate modifications: *New Journal of Chemistry*, v. 34, p. 993-1007.
- Strenkowska, M., P. Wanat, M. Ziemniak, J. Jemielity, and J. Kowalska, 2012, Preparation of Synthetically Challenging Nucleotides Using Cyanoethyl P-Imidazolides and Microwaves: *Organic Letters*, v. 14, p. 4782-4785.
- Szczepaniak, S., J. Zuberek, E. Darzynkiewicz, J. Kufel, and J. Jemielity, 2012, Affinity resins containing enzymatically resistant mRNA cap analogs-a new tool for the analysis of cap-binding proteins: *Rna*, v. 18, p. 1421-1432.
- TOMASZ, J., M. VAGHEFI, P. RATSEP, R. WILLIS, and R. ROBINS, 1988, NUCLEOSIDE IMIDODIPHOSPHATES SYNTHESIS AND BIOLOGICAL-ACTIVITIES: *Nucleic Acids Research*, v. 16, p. 8645-8664.
- Walczak, S., A. Nowicka, D. Kubacka, K. Fac, P. Wanat, S. Mroczek, J. Kowalska, and J. Jemielity, 2017, A novel route for preparing 5' cap mimics and capped RNAs: phosphate-modified cap analogues obtained via click chemistry: *Chemical Science*, v. 8, p. 260-267.
- Wanat, P., S. Walczak, B. Wojtczak, M. Nowakowska, J. Jemielity, and J. Kowalska, 2015, Ethynyl, 2-Propynyl, and 3-Butynyl C-Phosphonate Analogues of Nucleoside Di- and Triphosphates: Synthesis and Reactivity in CuAAC: *Organic Letters*, v. 17, p. 3062-3065.

Warminski, M., J. Kowalska, J. Buck, J. Zuberek, M. Lukaszewicz, C. Nicola, A. Kuhn, U. Sahin, E. Darzynkiewicz, and J. Jemielity, 2013, The synthesis of isopropylidene mRNA cap analogs modified with phosphorothioate moiety and their evaluation as promoters of mRNA translation: *Bioorganic & Medicinal Chemistry Letters*, v. 23, p. 3753-3758.

Wojtczak, B., M. Warminski, J. Kowalska, M. Lukaszewicz, M. Honcharenko, C. Smith, R. Stromberg, E. Darzynkiewicz, and J. Jemielity, 2016, Clickable trimethylguanosine cap analogs modified within the triphosphate bridge: synthesis, conjugation to RNA and susceptibility to degradation: *Rsc Advances*, v. 6, p. 8326-8337.

YOSHIKAWA.M, T. KATO, and TAKENISH.T, 1967, A NOVEL METHOD FOR PHOSPHORYLATION OF NUCLEOSIDES TO 5'-NUCLEOTIDES: *Tetrahedron Letters*, p. 5065-&.

Ziemniak, M., M. Szabelski, M. Lukaszewicz, A. Nowicka, E. Darzynkiewicz, R. Rhoads, Z. Wieczorek, and J. Jemielity, 2013, Synthesis and evaluation of fluorescent cap analogues for mRNA labelling: *Rsc Advances*, v. 3, p. 20943-20958.

Zytek, M., J. Kowalska, M. Lukaszewicz, B. Wojtczak, J. Zuberek, A. Ferenc-Mrozek, E. Darzynkiewicz, A. Niedzwiecka, and J. Jemielity, 2014, Towards novel efficient and stable nuclear import signals: synthesis and properties of trimethylguanosine cap analogs modified within the 5',5'-triphosphate bridge: *Organic & Biomolecular Chemistry*, v. 12, p. 9184-9199.

## Appendix A - AMP and ADP spectra on different equipment types

| Equipment                                     | ADP<br>30 $\mu$ M<br>(MetOH:H <sub>2</sub> O 1:1, 5% NH <sub>3</sub> ) |                             | AMP<br>30 $\mu$ M<br>(MetOH:H <sub>2</sub> O 1:1, 5% NH <sub>3</sub> ) |                             |
|-----------------------------------------------|------------------------------------------------------------------------|-----------------------------|------------------------------------------------------------------------|-----------------------------|
|                                               | QexactiveThermo<br>QTOF Waters                                         | ESI<br>negative ion<br>mode | ESI positive<br>ion mode                                               | ESI<br>negative ion<br>mode |
| QTRAP 3200 Sciex Q1                           |                                                                        |                             |                                                                        |                             |
| QTRAP 3200 Sciex EPI<br>(Enhance Product Ion) |                                                                        |                             |                                                                        |                             |
| API 3200 AB Sciex Q1                          |                                                                        |                             |                                                                        |                             |

QExactive Thermo, ADP, CE 25 ESI (-)

160714\_ADP #398-510 RT: 3.79-4.86 AV: 113 NL: 5.56E5  
T: FTMS - p ESI Full ms2 426.00@hcd25.00 [50.00-500.00]

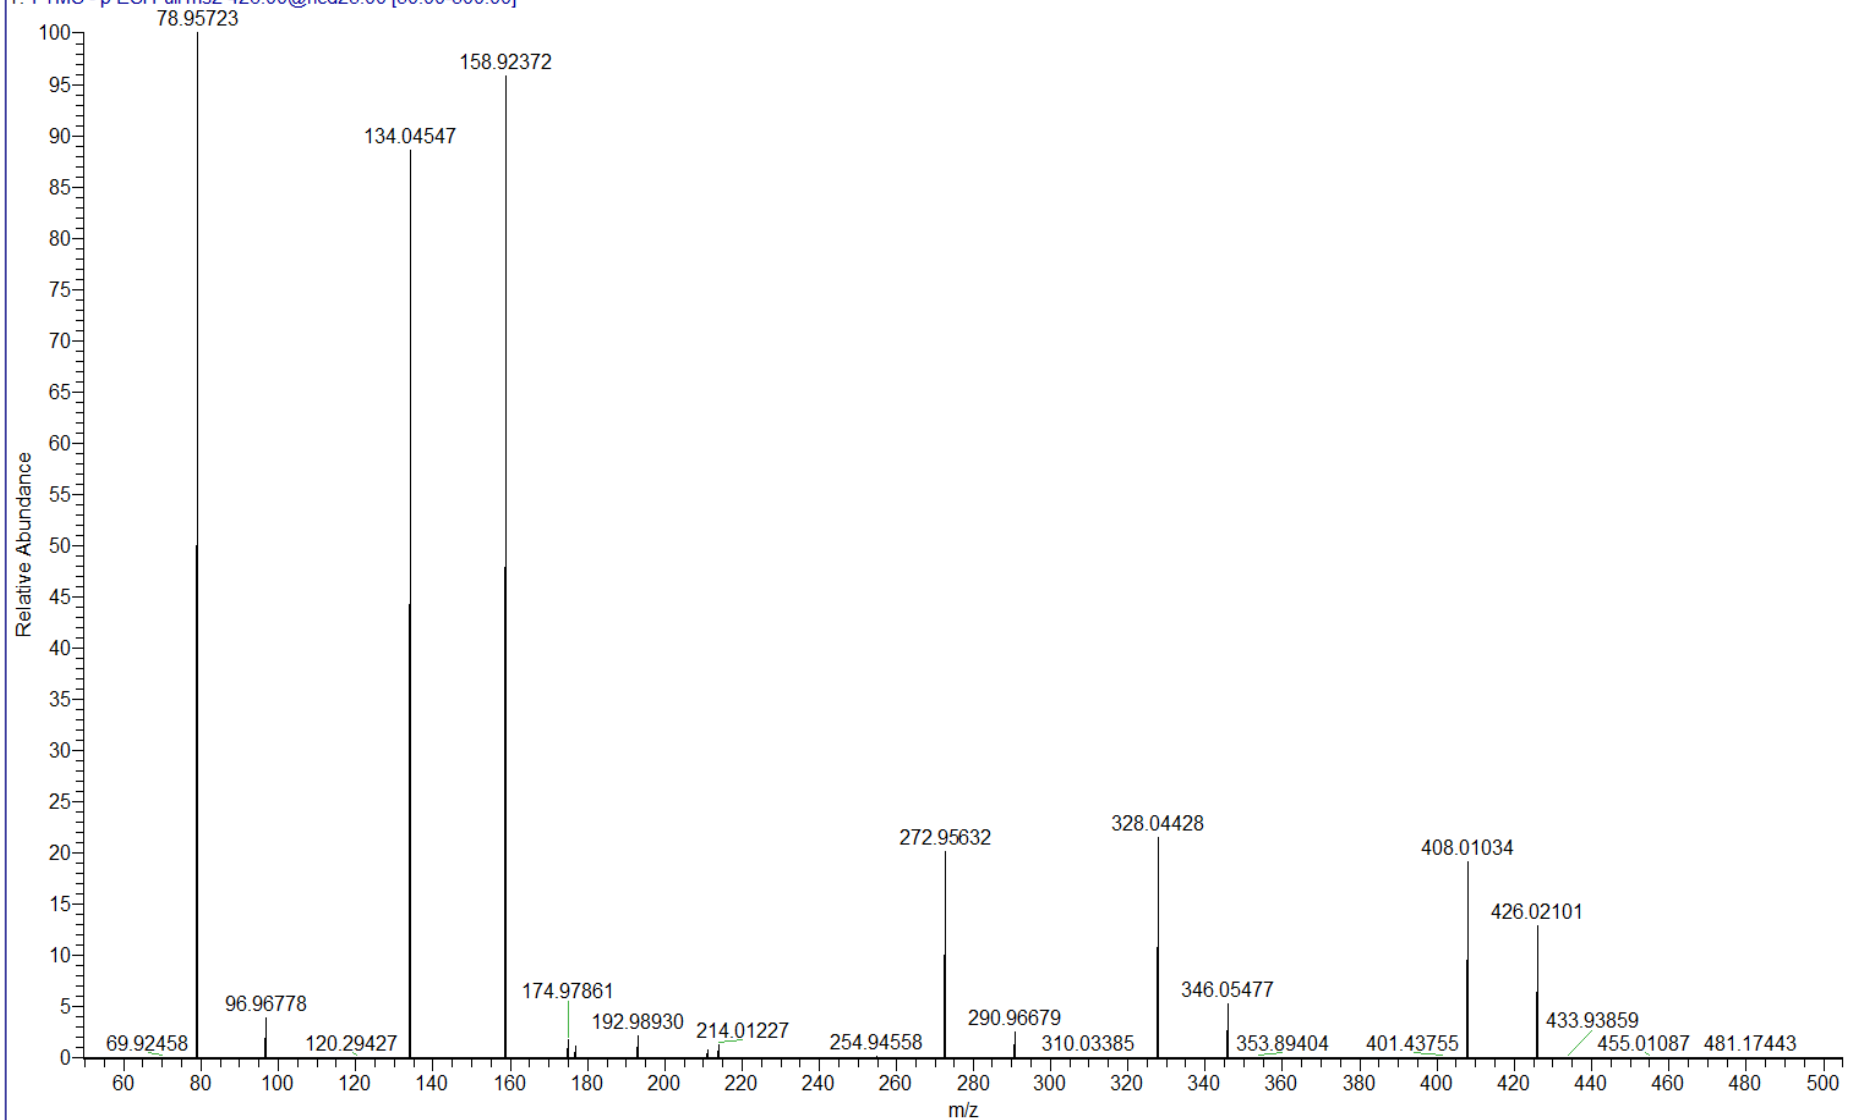

QTOF Waters, ADP, CE 20 ESI (-)

11:20:13

14-Jul-2016

160714\_ADG\_NEG\_30UM\_426 120 (2.052) Cm (112:150)

TOF MSMS 426.00ES-

5.73e3

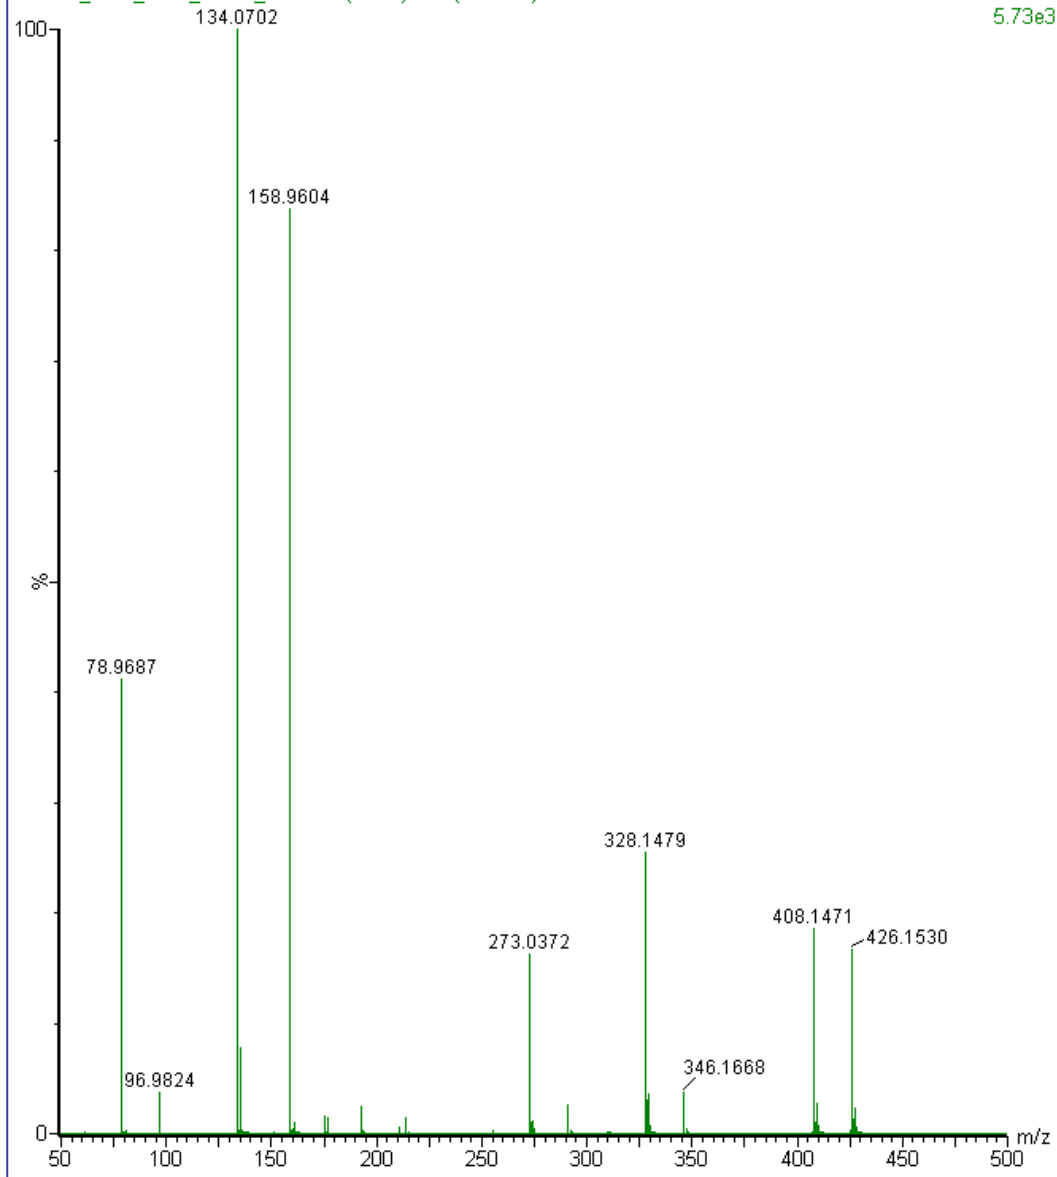

QTRAP 3200 AB Sciex, ADP, CE 39 ESI (-), EPI

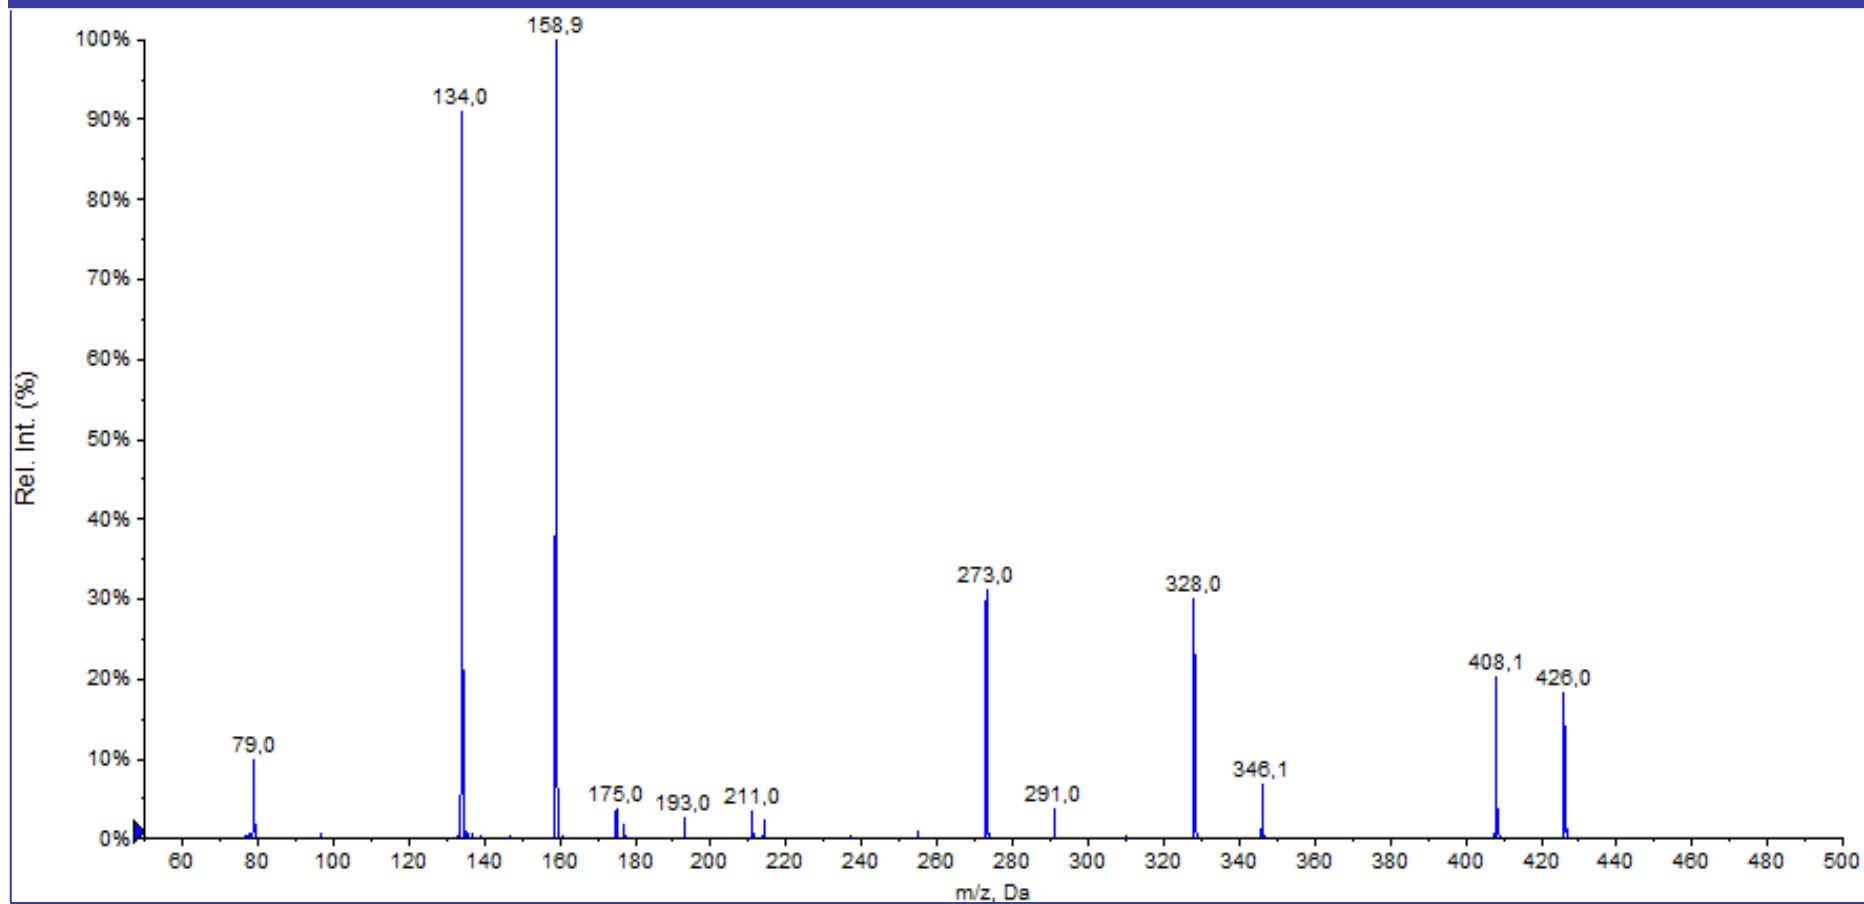



QTRAP 3200 AB Sciex, ADP, CE 40 ESI (-), Q1/Q3

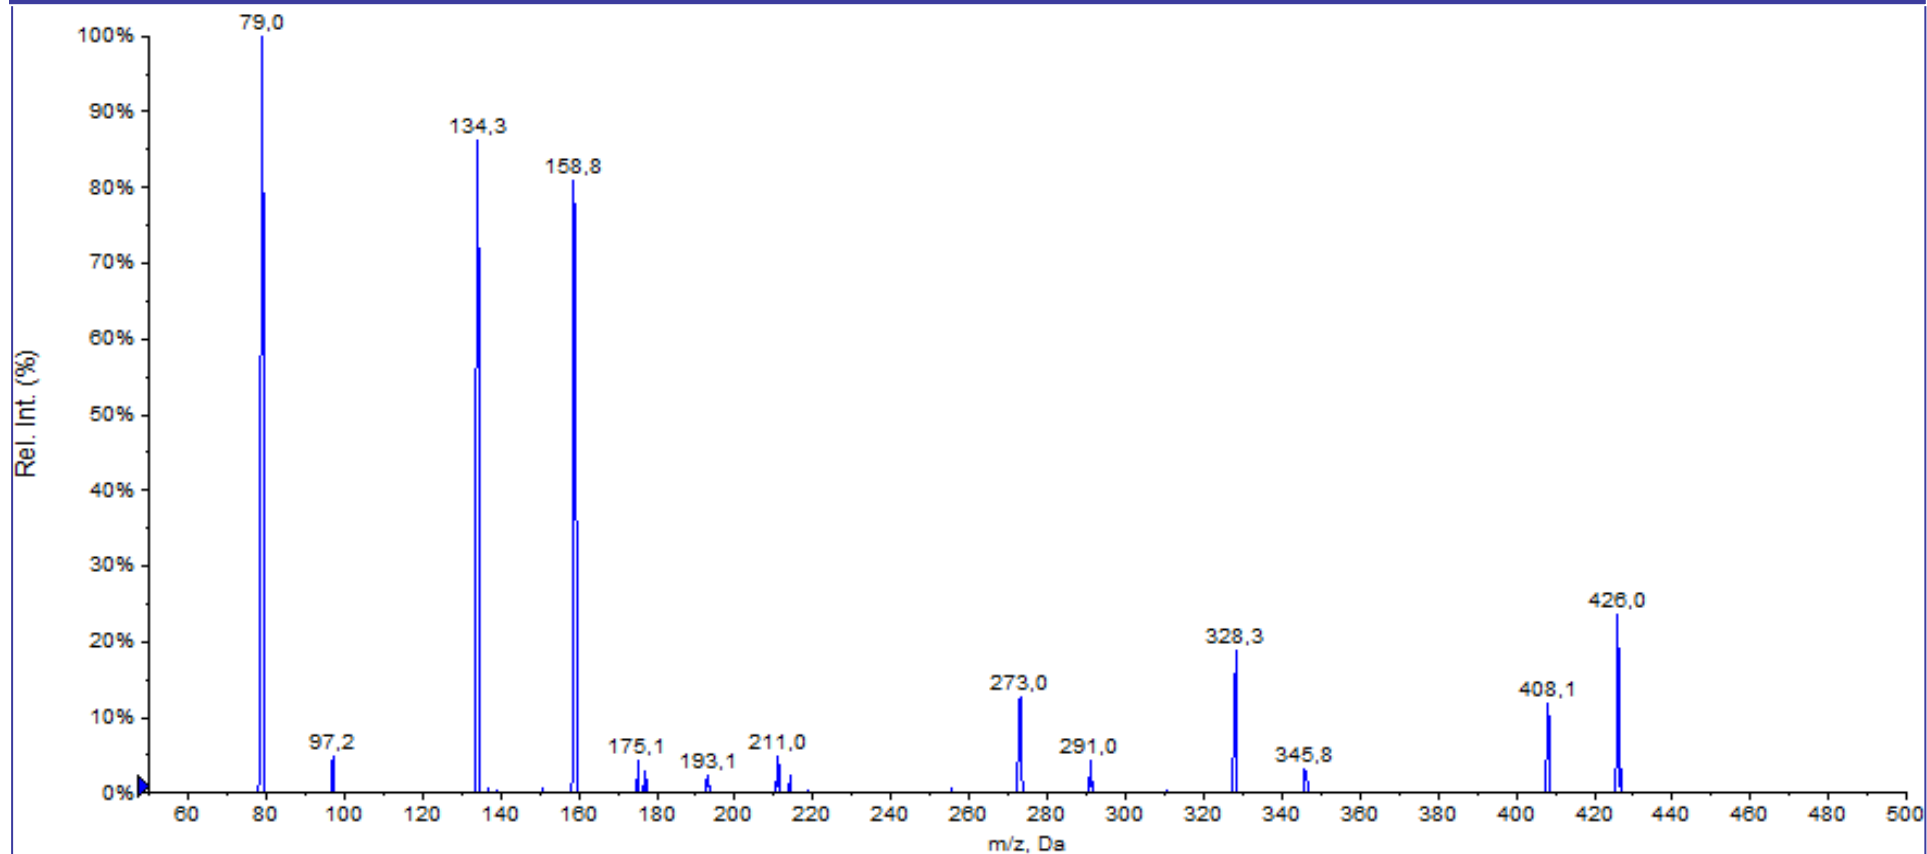

API 3200 AB Sciex, ADP, CE 45 ESI (-)

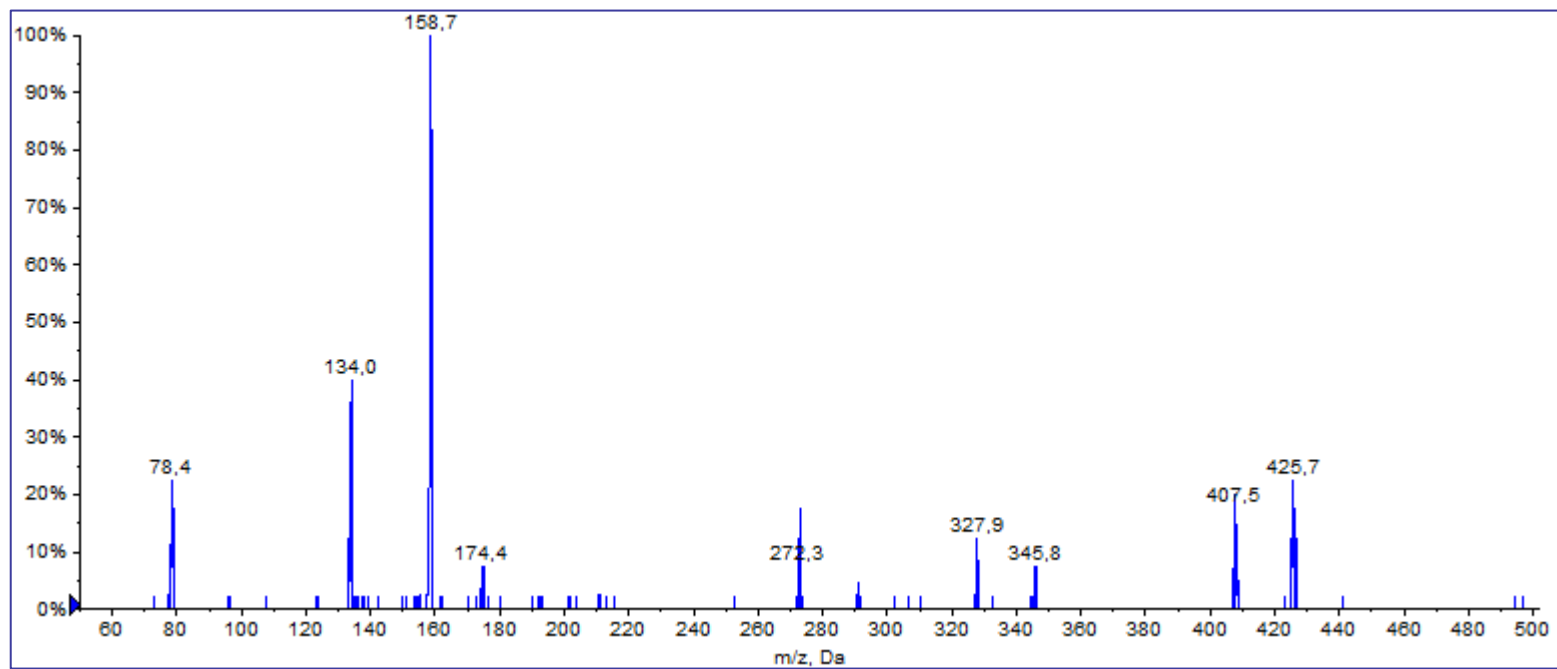

QExactive Thermo, ADP, CE 16 ESI (+)

160714\_ADP#191-266 RT: 1.82-2.53 AV: 76 NL: 4.04E7  
T: FTMS + p ESI Full ms2 428.00@hcd16.00 [50.00-500.00]

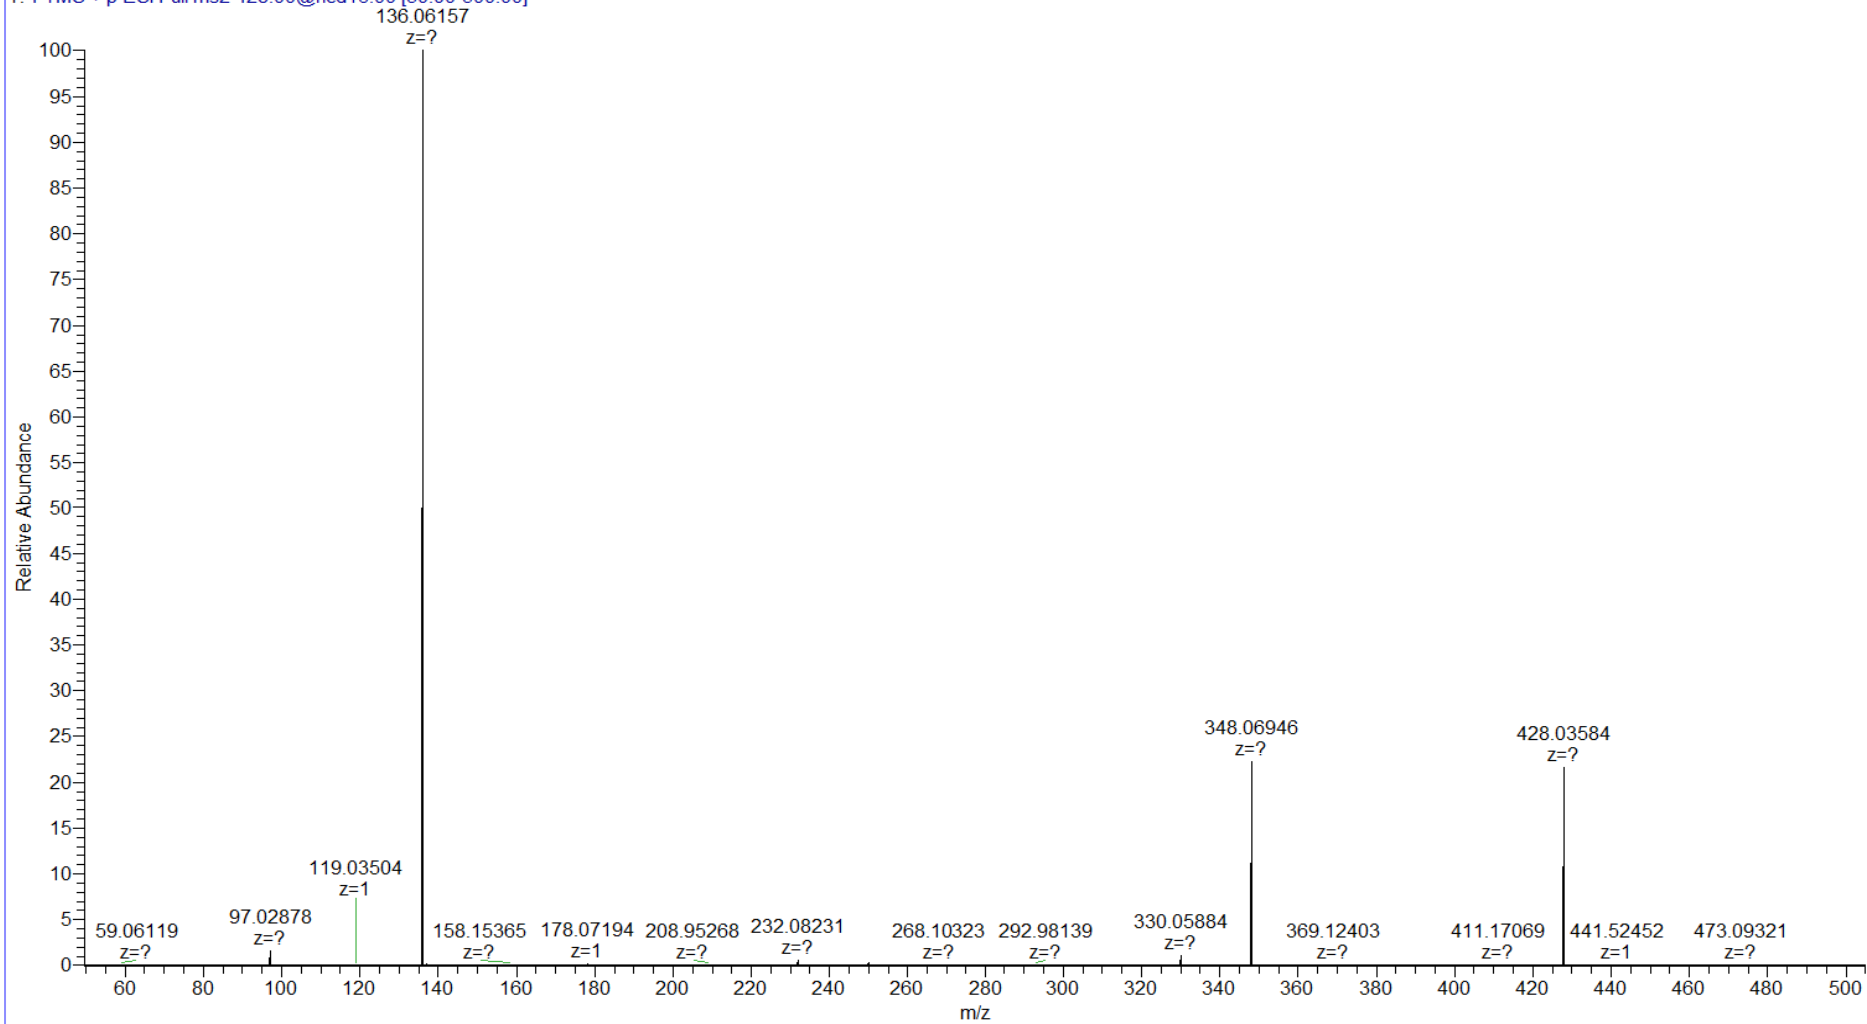

QTOF Waters, ADP, CE 13 ESI (+)

11:24:02

14-Jul-2016

160714\_ADP\_POZ\_30UM\_428 175 (2.993) Cm (151:190)

TOF MSMS 428.01ES+  
9.04e3

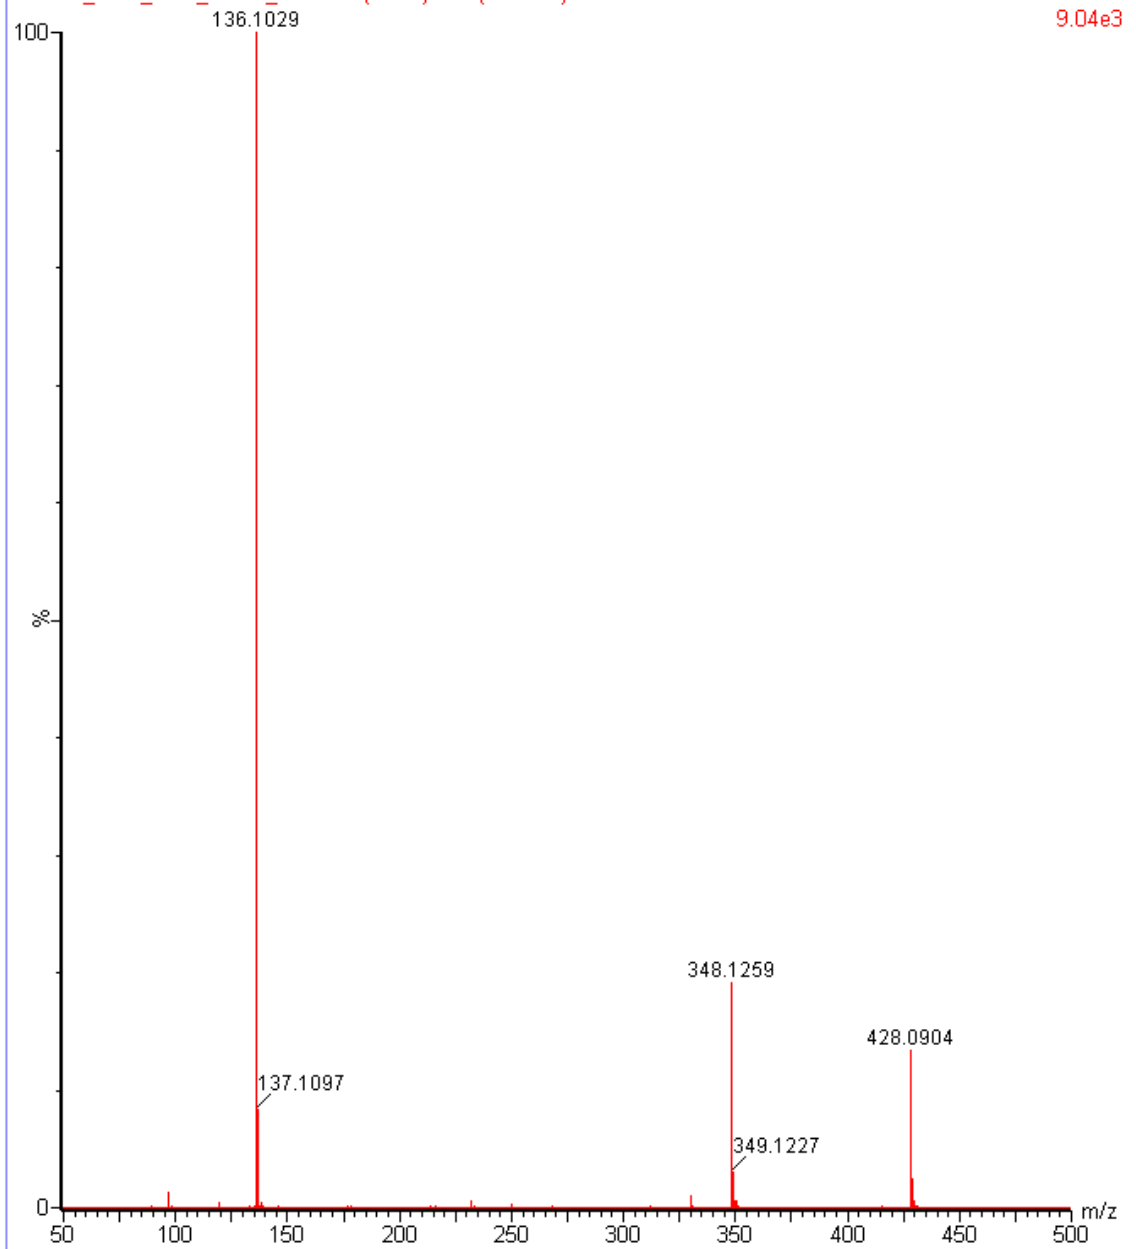

QTRAP 3200 AB Sciex, ADP, CE 30 ESI (+), Q1

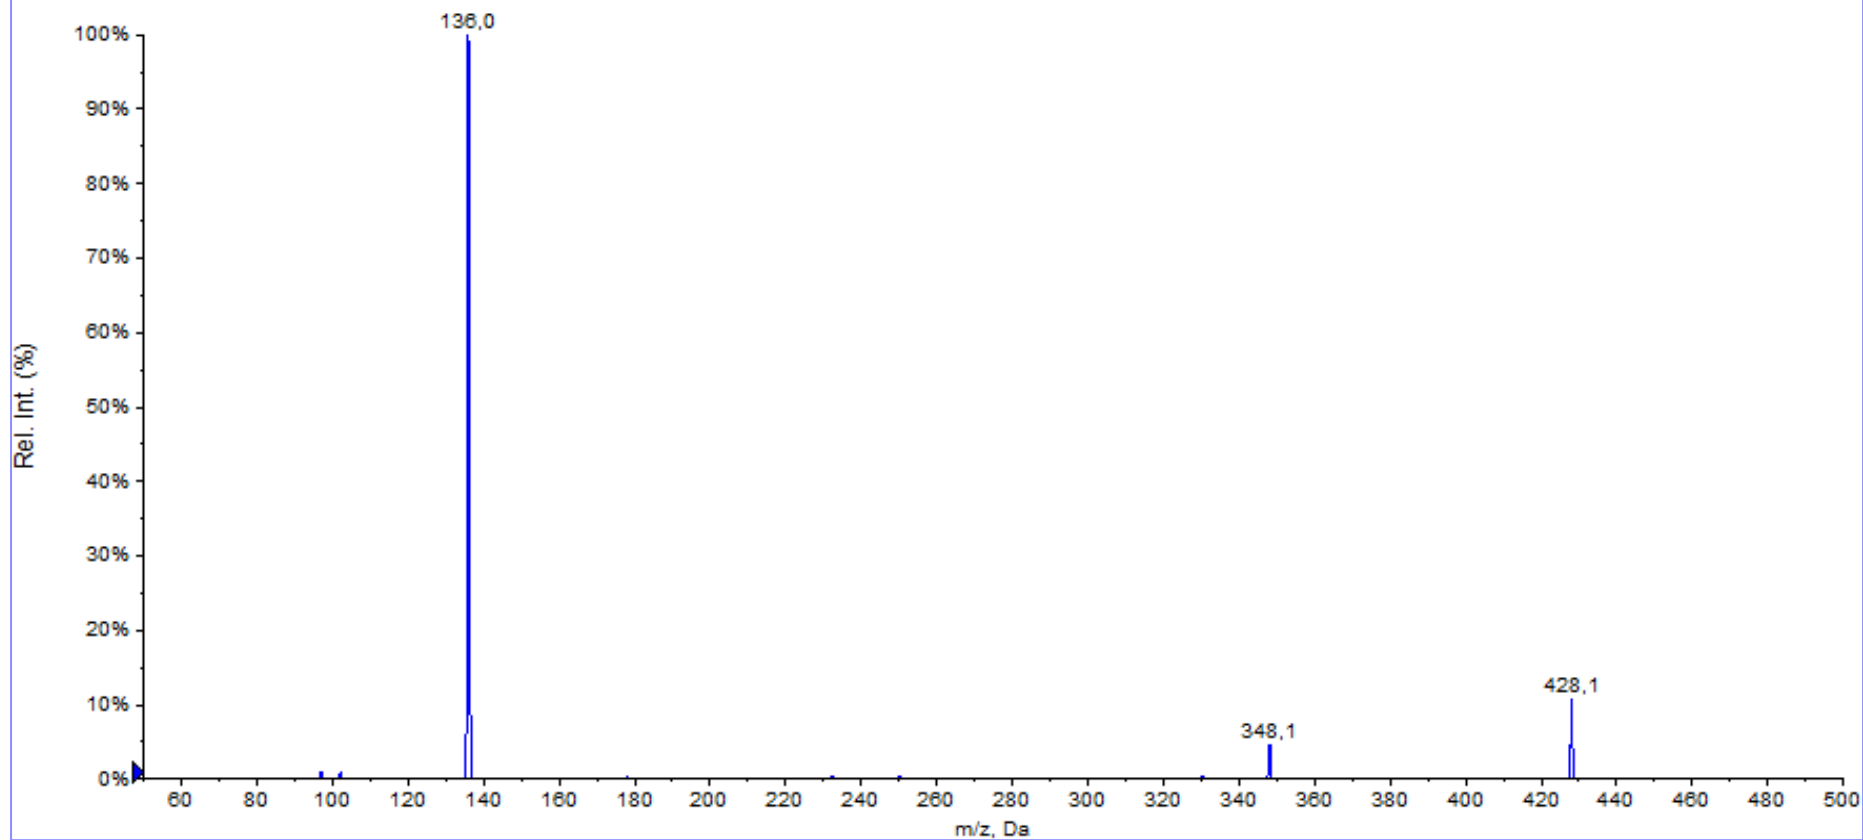

QTRAP 3200 AB Sciex, ADP, CE 30 ESI (+), EPI

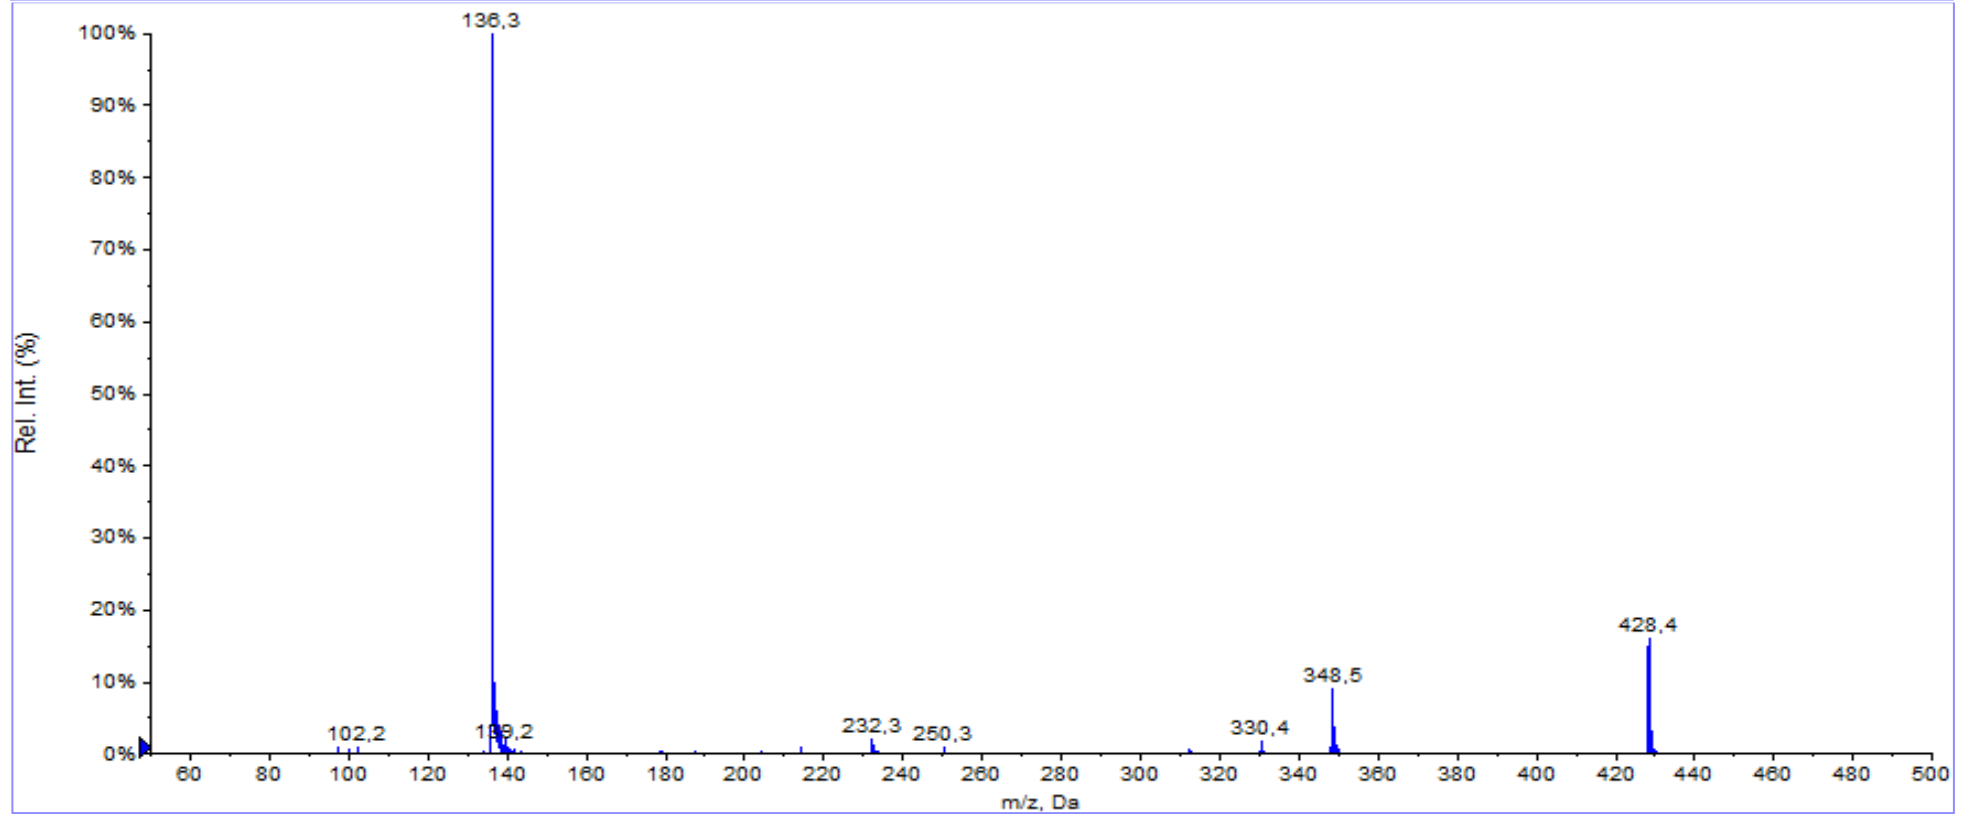

API 3200 AB Sciex, ADP, CE 30 ESI (+)

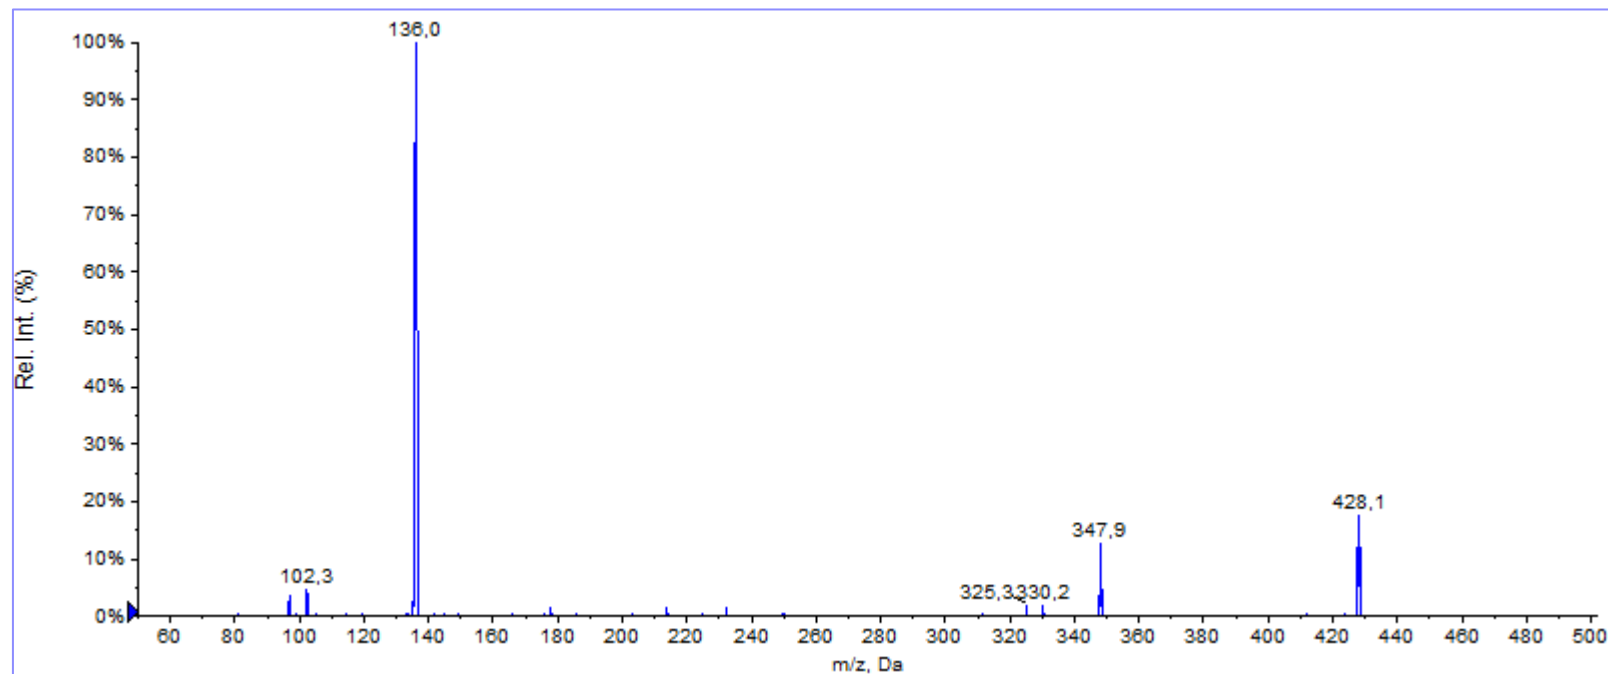

**QExactive Thermo, AMP, CE 20 ESI (-)**

160714 AMP #104-211 RT: 0.99-2.00 AV: 108 NL: 9.47E5  
T: FTMS - p ESI Full ms2 346.00@hcd20.00 [50.00-500.00]

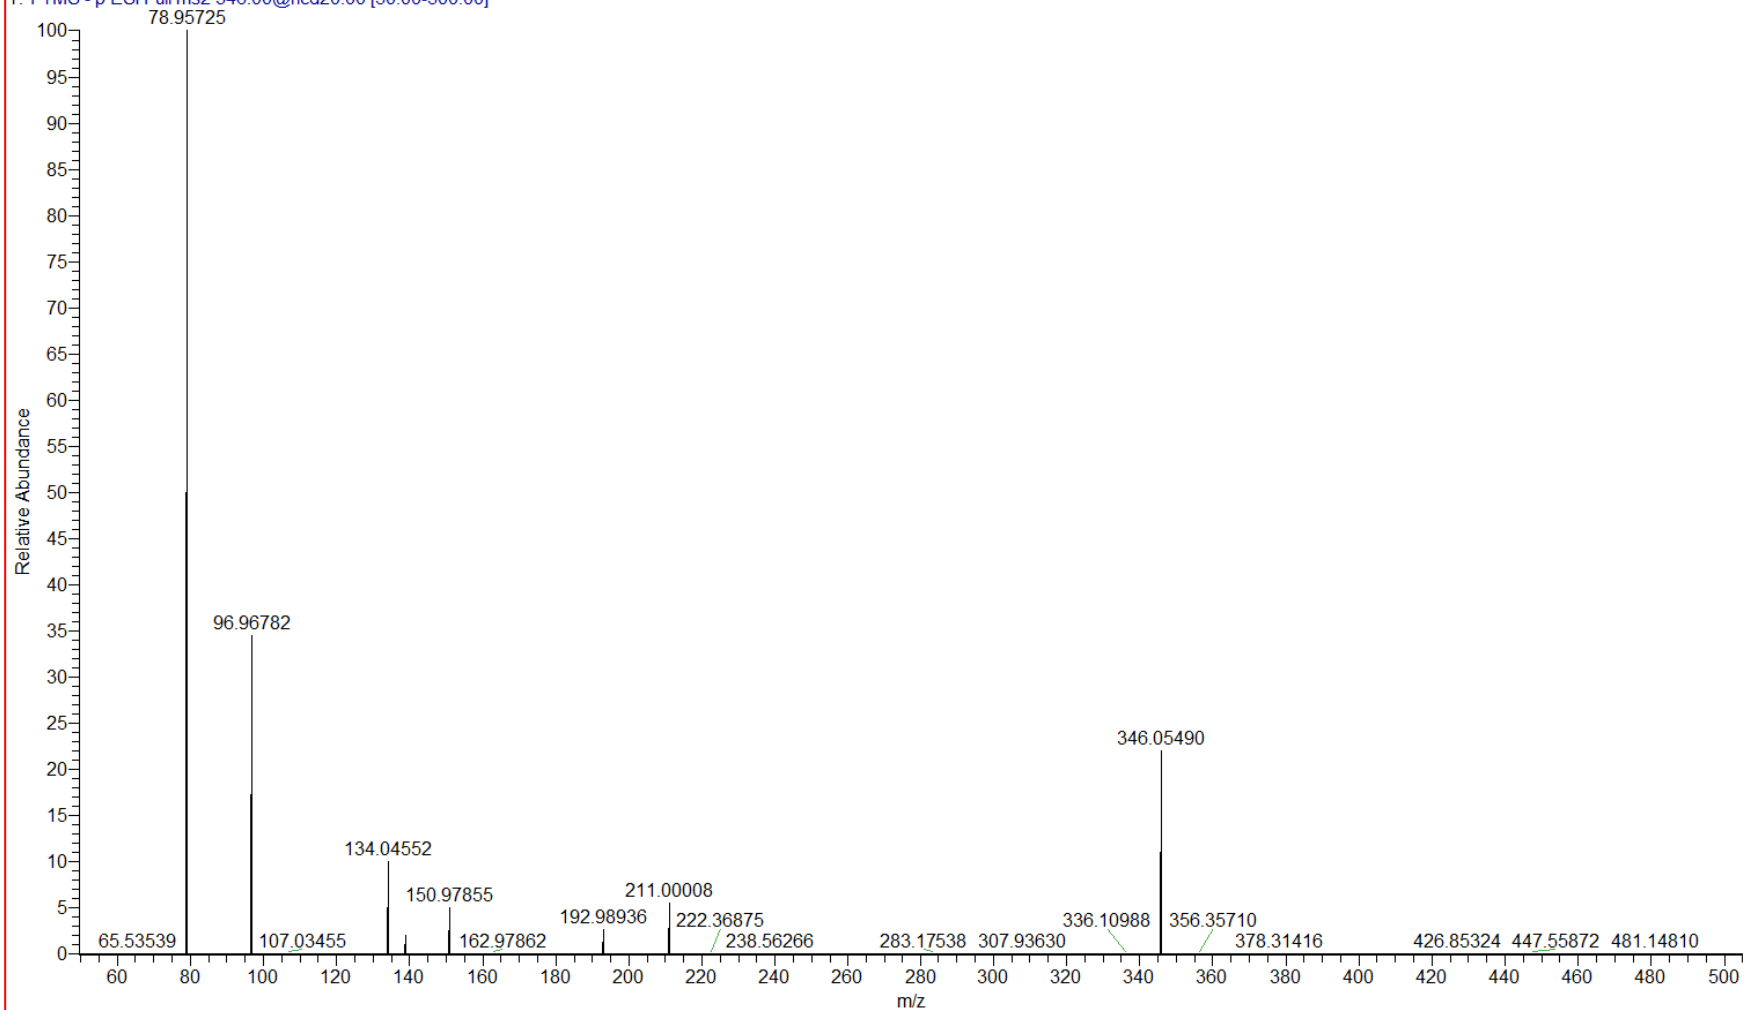



QTOF Waters, AMP, CE 20 ESI (-)

11:15:18  
14-Jul-2016

160714\_AMP\_NEG\_346 125 (2.138) Cm (110:153)

TOF MSMS 346.00ES-  
1.13e4

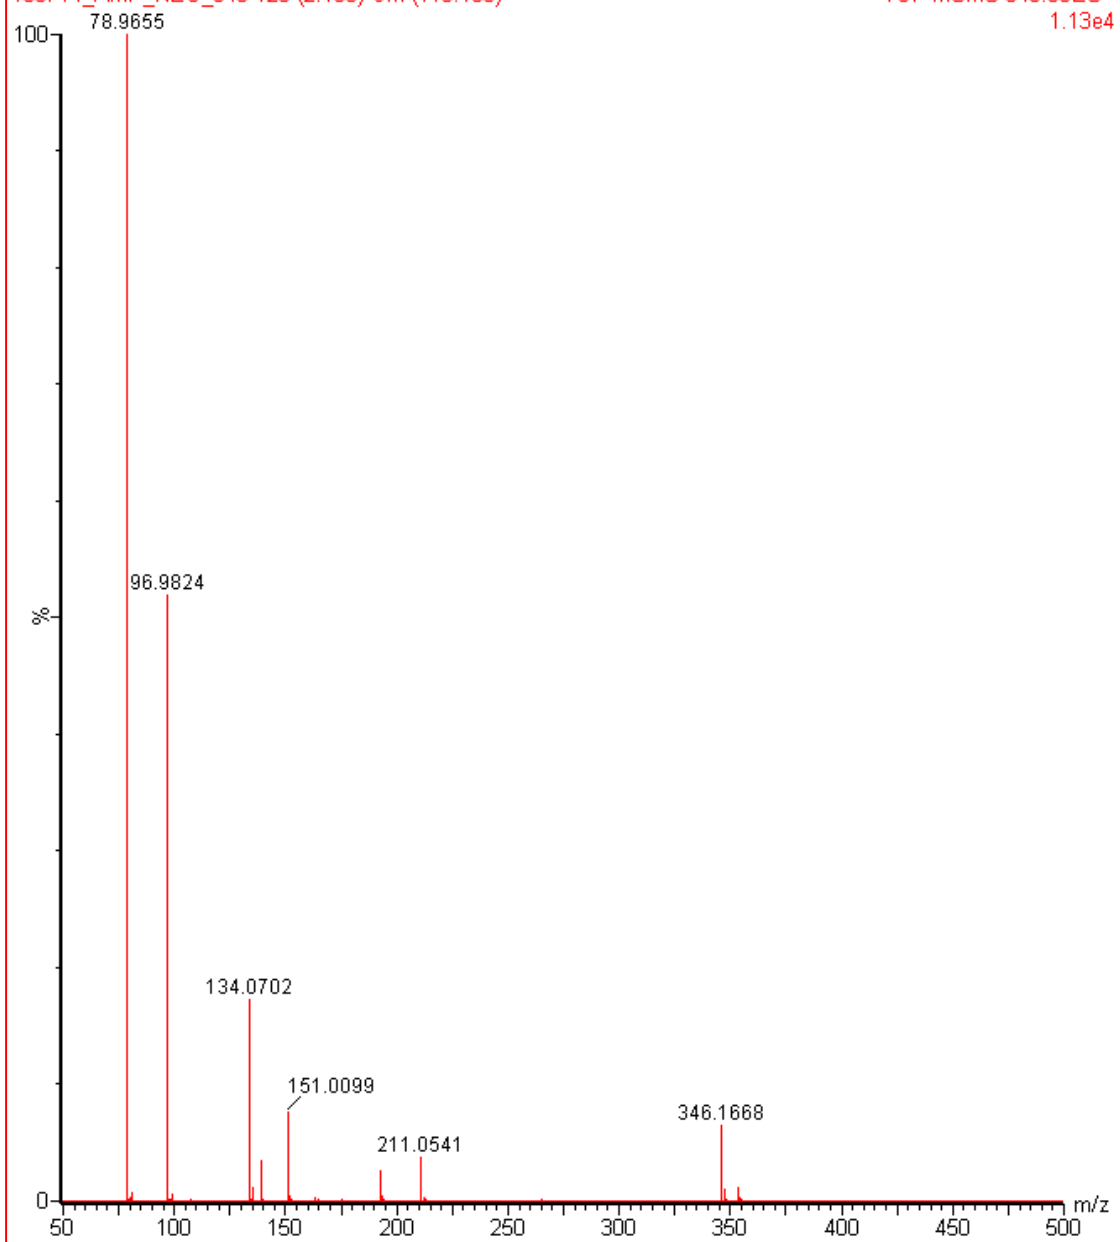

QTRAP 3200AB Sciex, AMP, CE 39 ESI (-), Q1

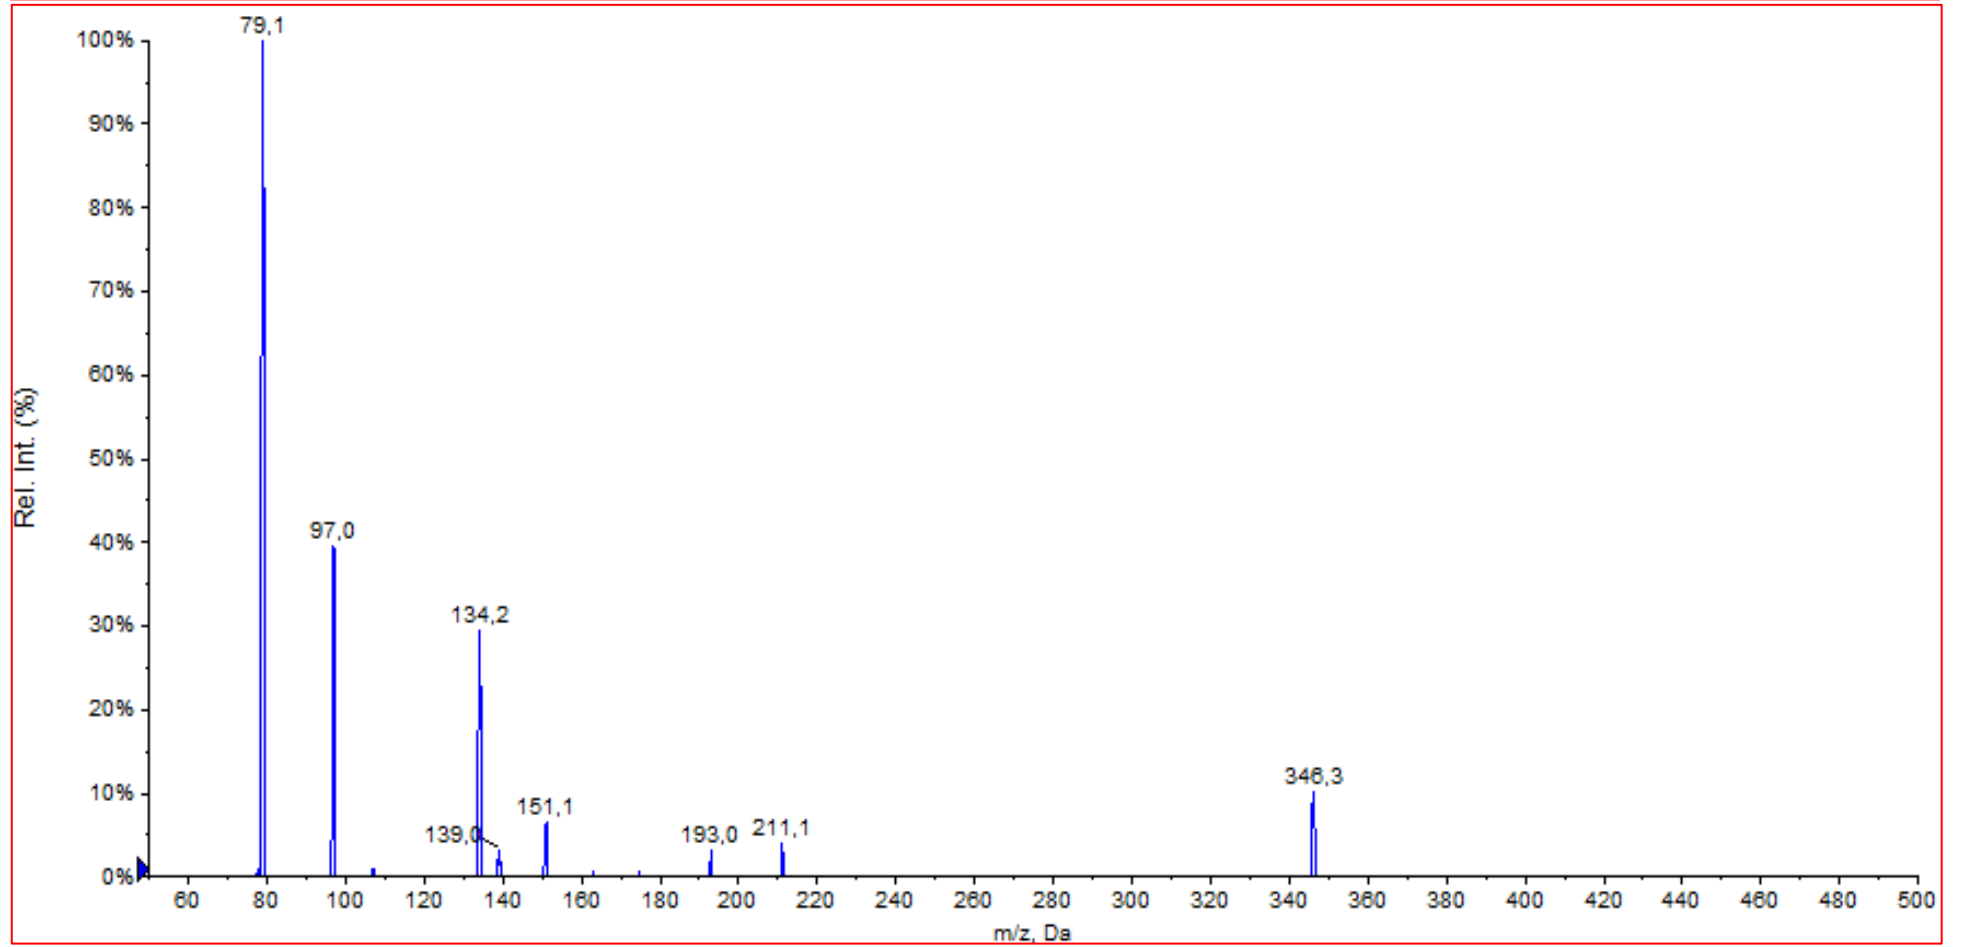

QTRAP 3200 AB Sciex, AMP, CE 45 ESI (-), EPI

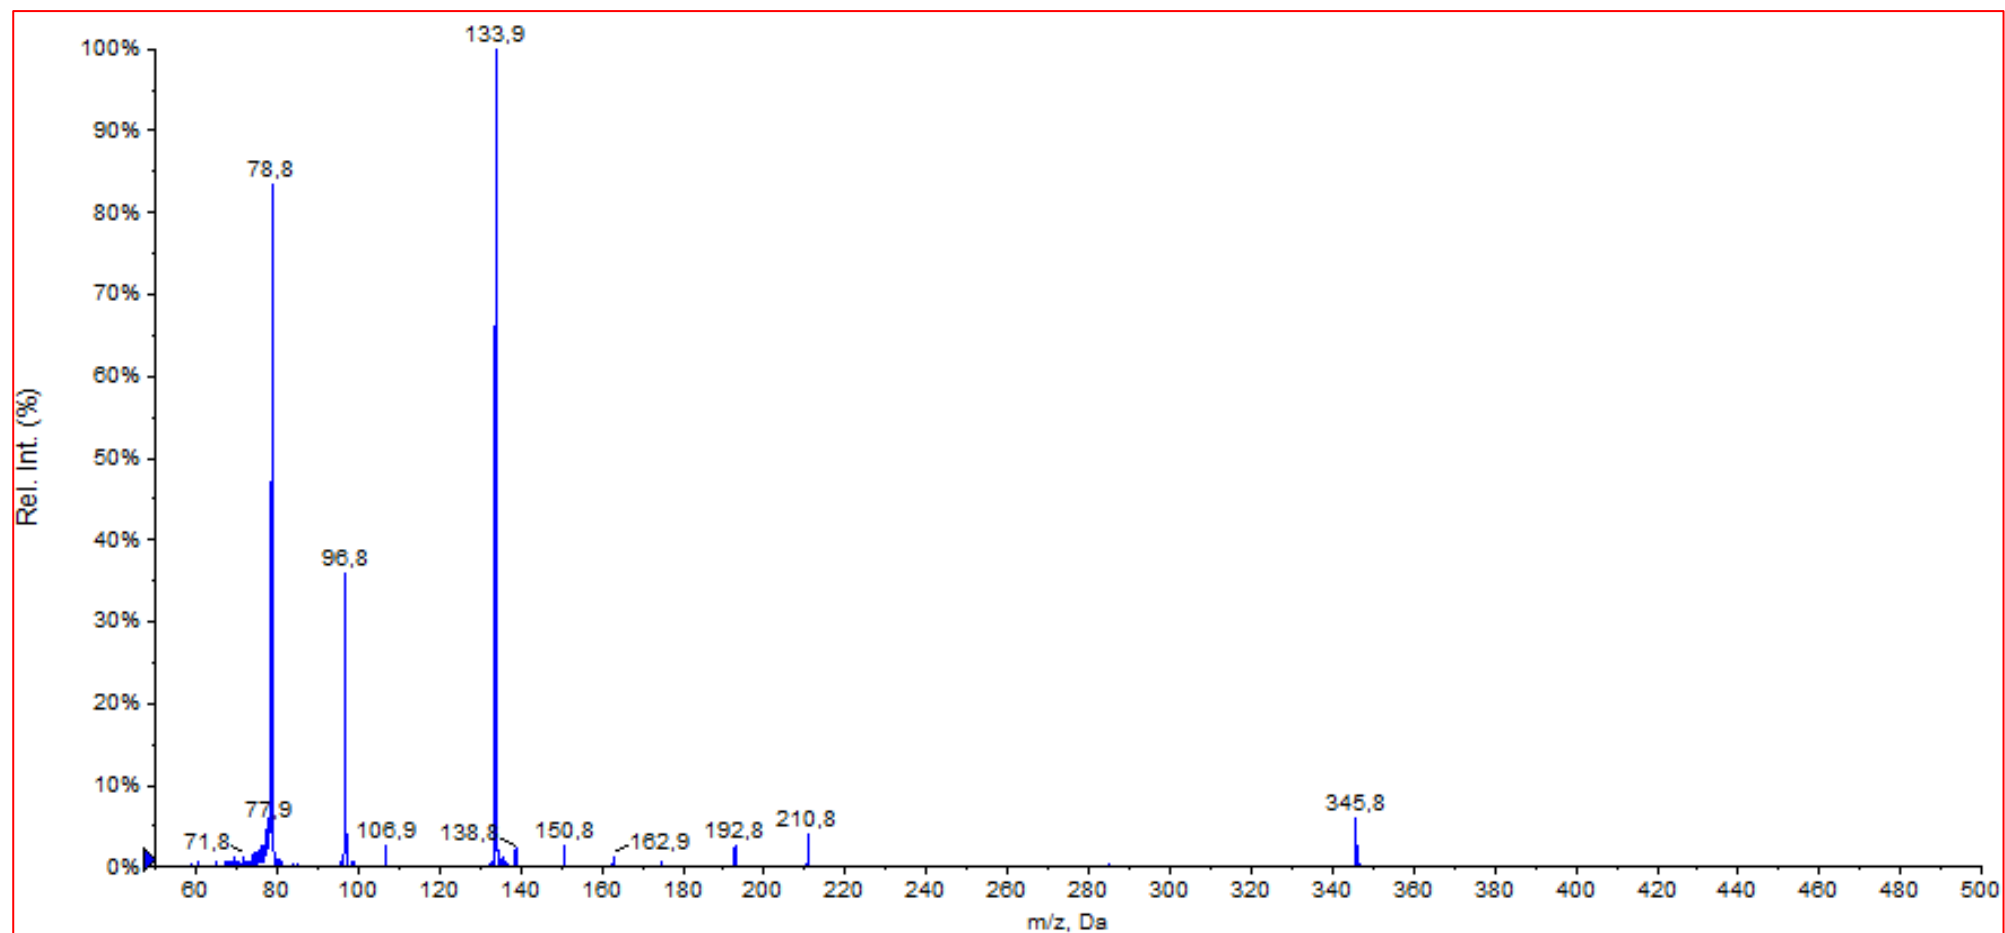

API 3200 AB Sciex, AMP, CE 40 ESI (-)

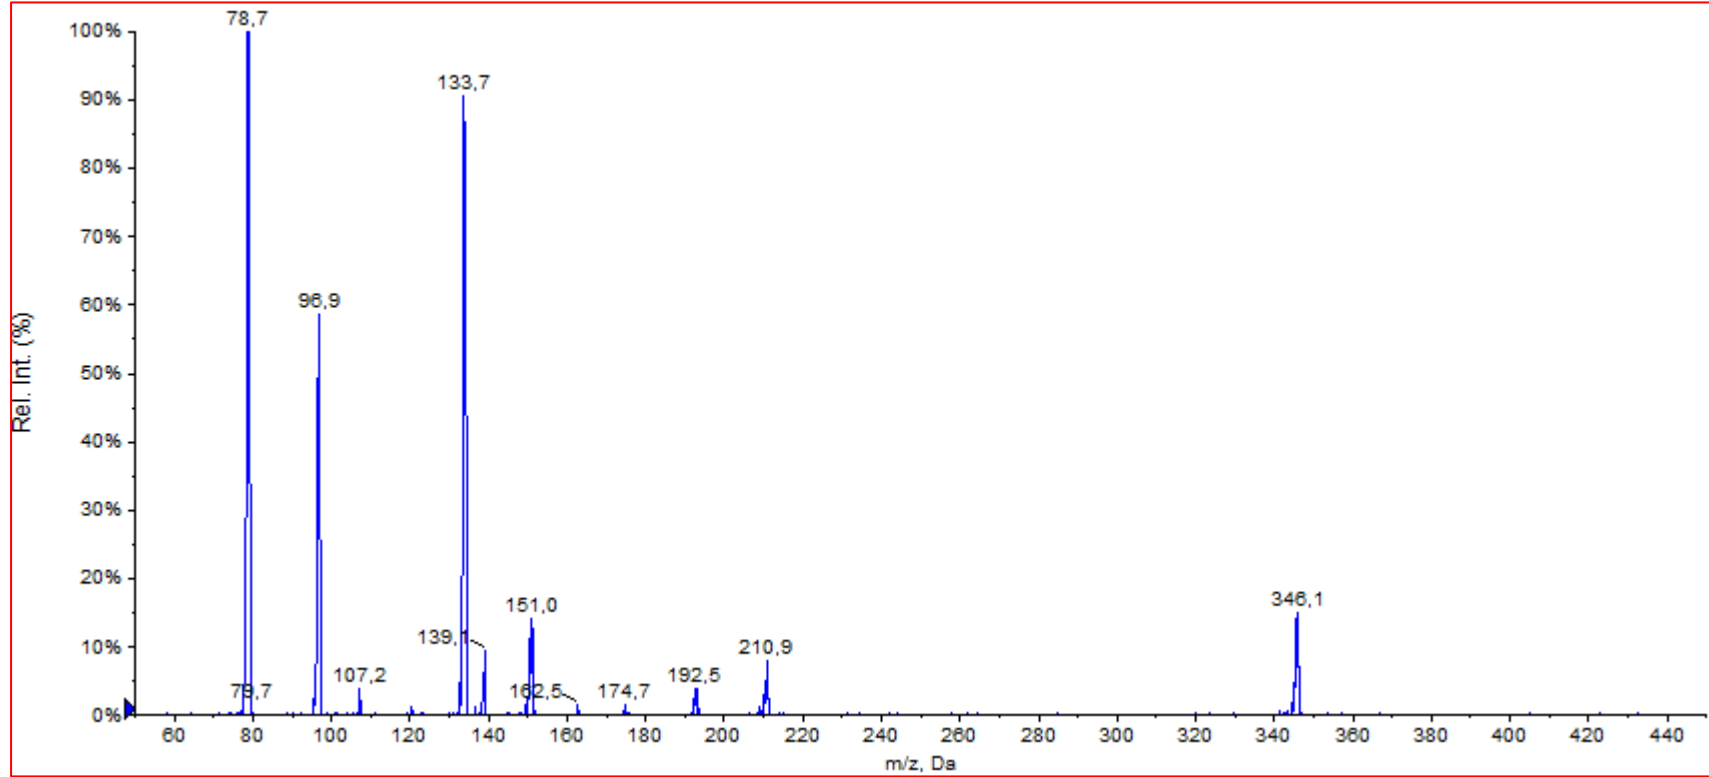

QExactive Thermo, AMP, CE 15 ESI (+)

160714 AMP #320-426 RT: 3.04-4.05 AV: 107 NL: 5.82E7  
T: FTMS + p ESI Full ms2 348.00@hcd15.00 [50.00-500.00]

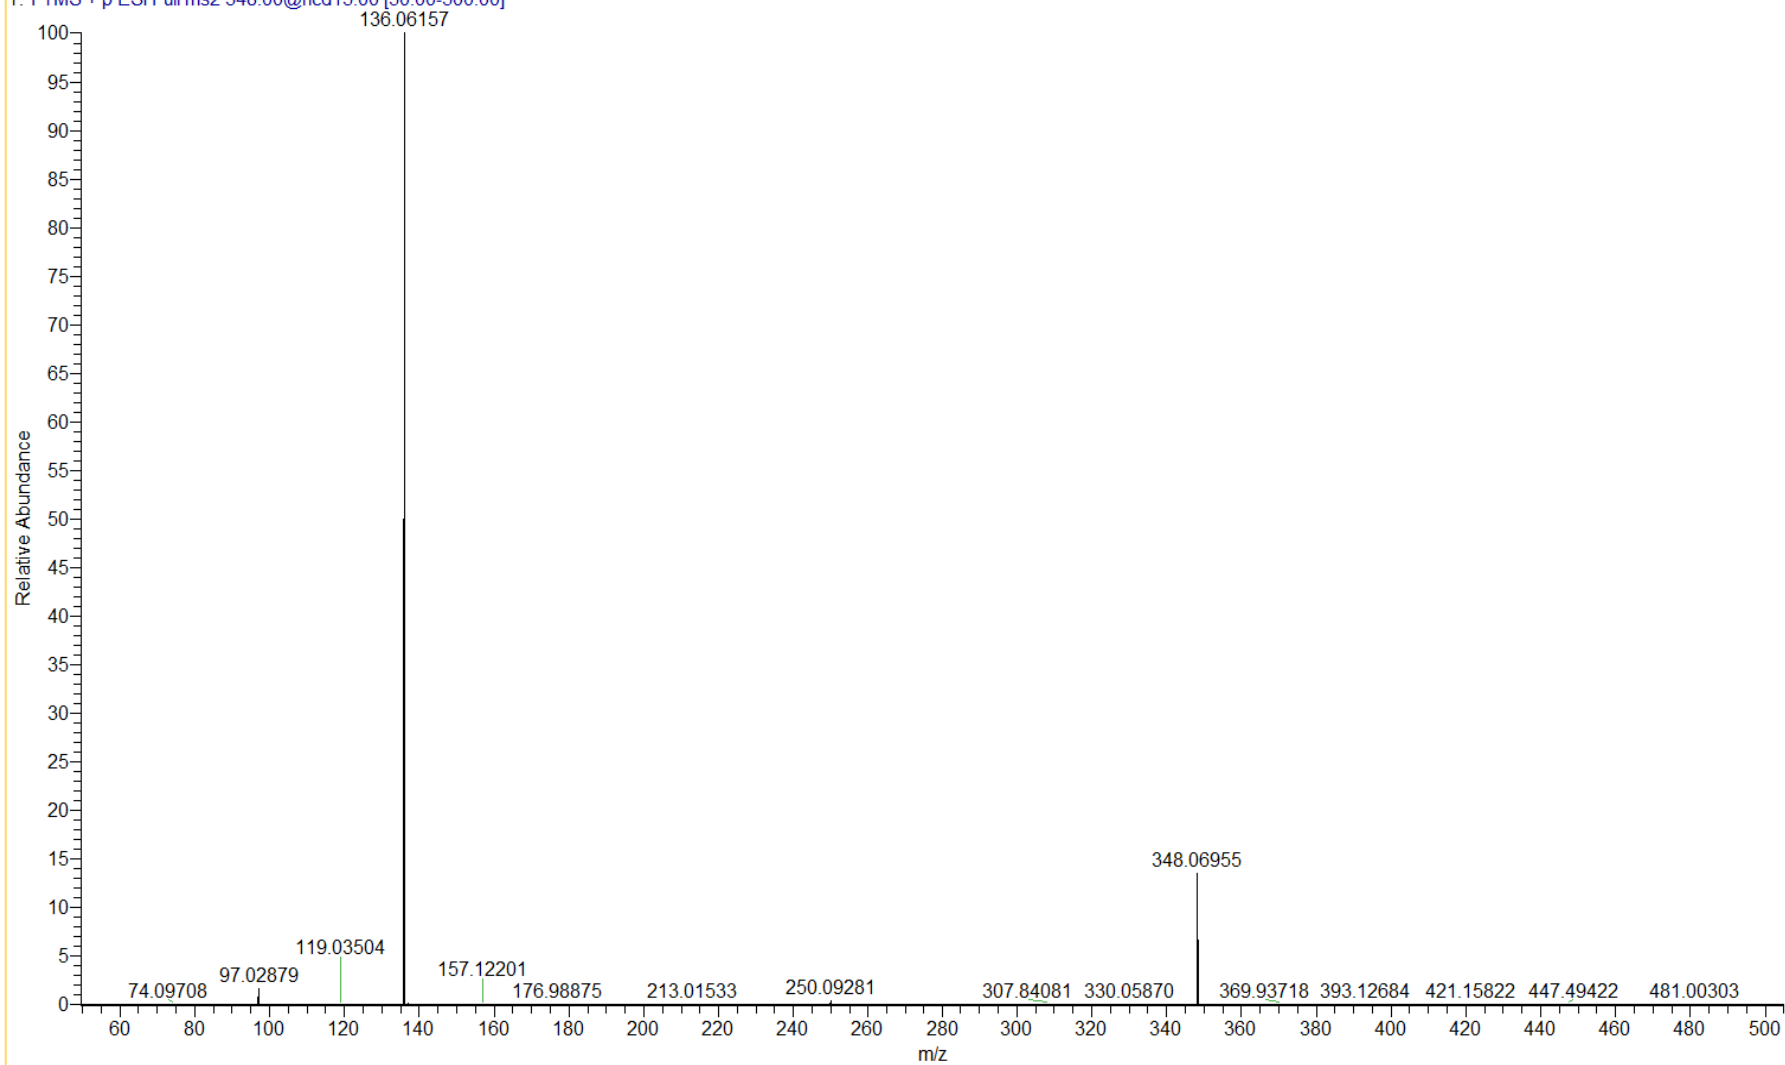

QTOF Waters, AMP, CE 12 ESI (+)

11:12:05

14-Jul-2016

160714\_AMP\_POZ\_348 75 (1.283) Cm (42:80)

TOF MSMS 348.01ES+

1.31e4

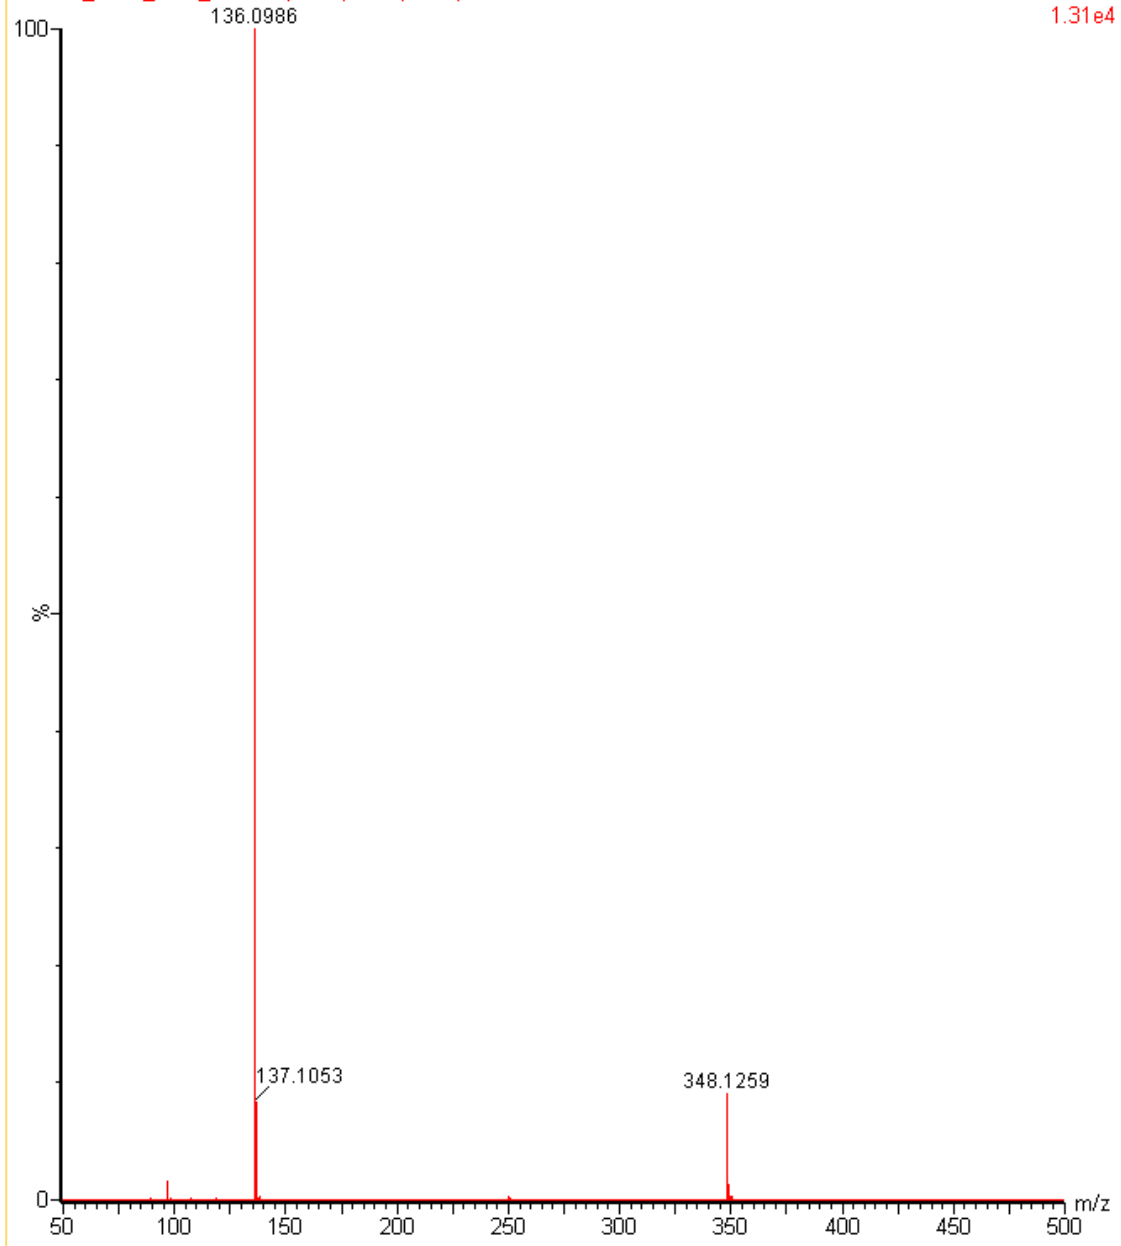

QTRAP 3200 AB Sciex, AMP, CE 23 ESI (+), Q1

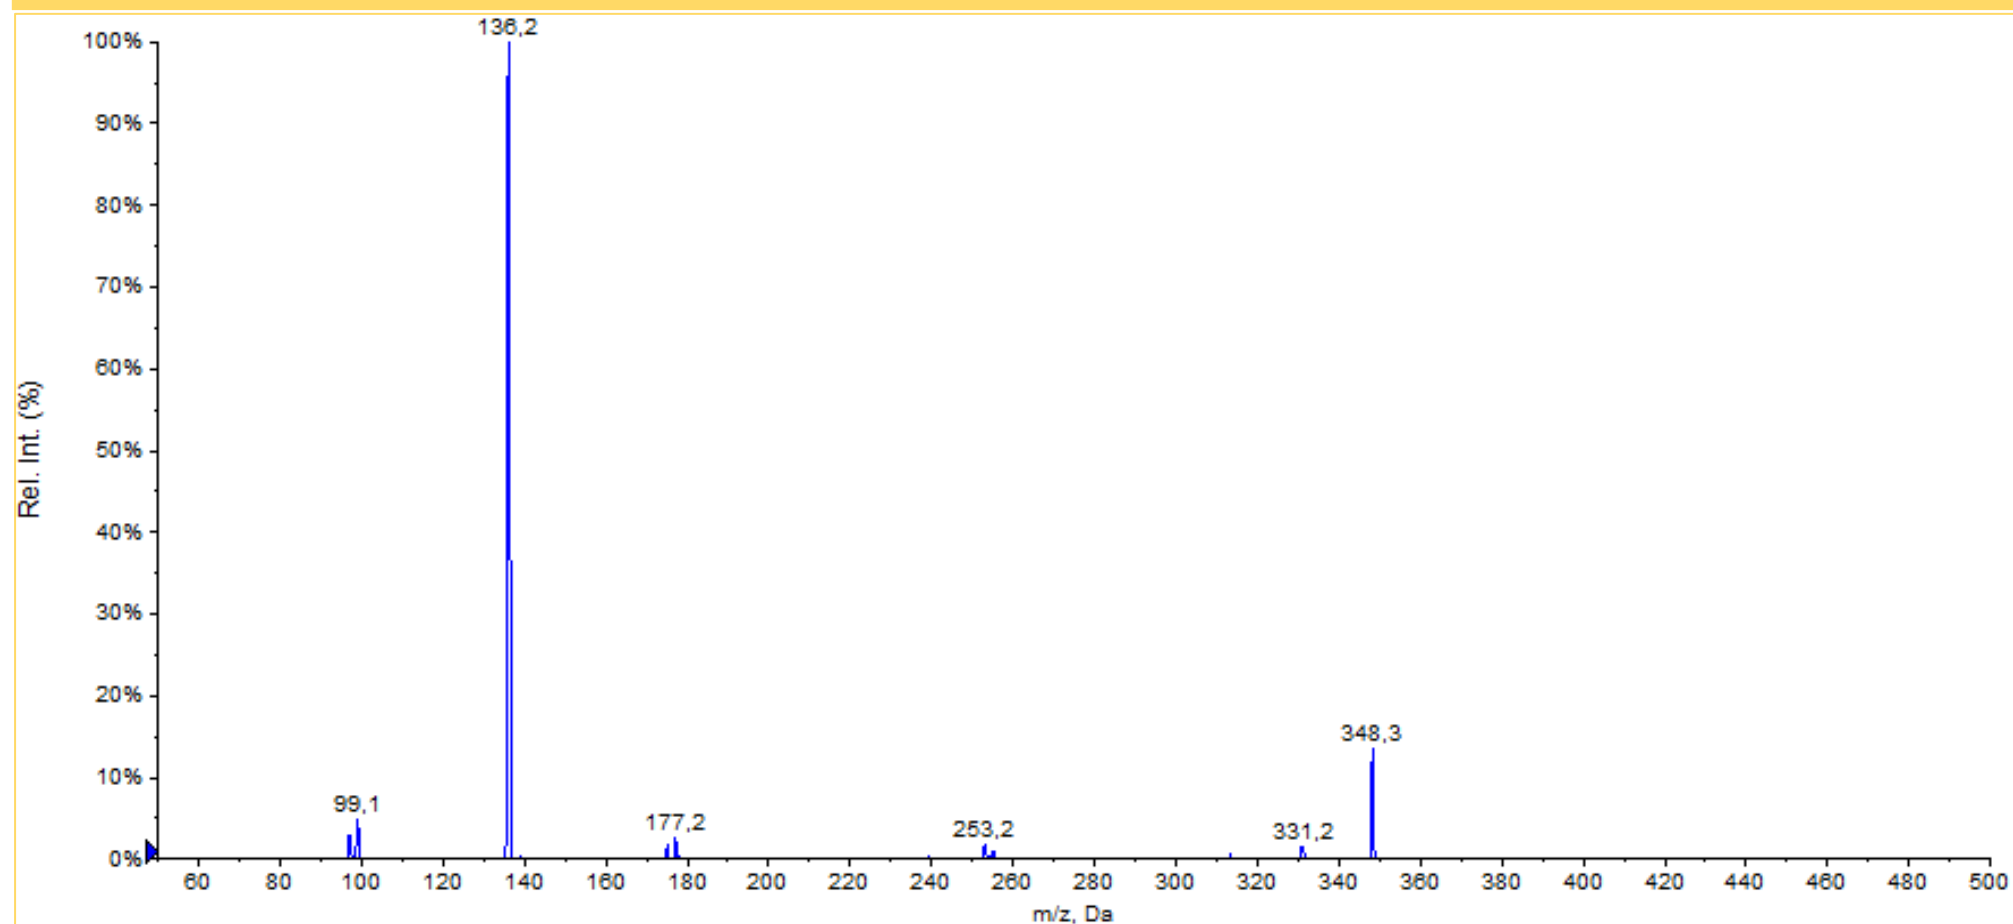

QTRAP 3200 AB Sciex, AMP, CE 25 ESI (+), EPI

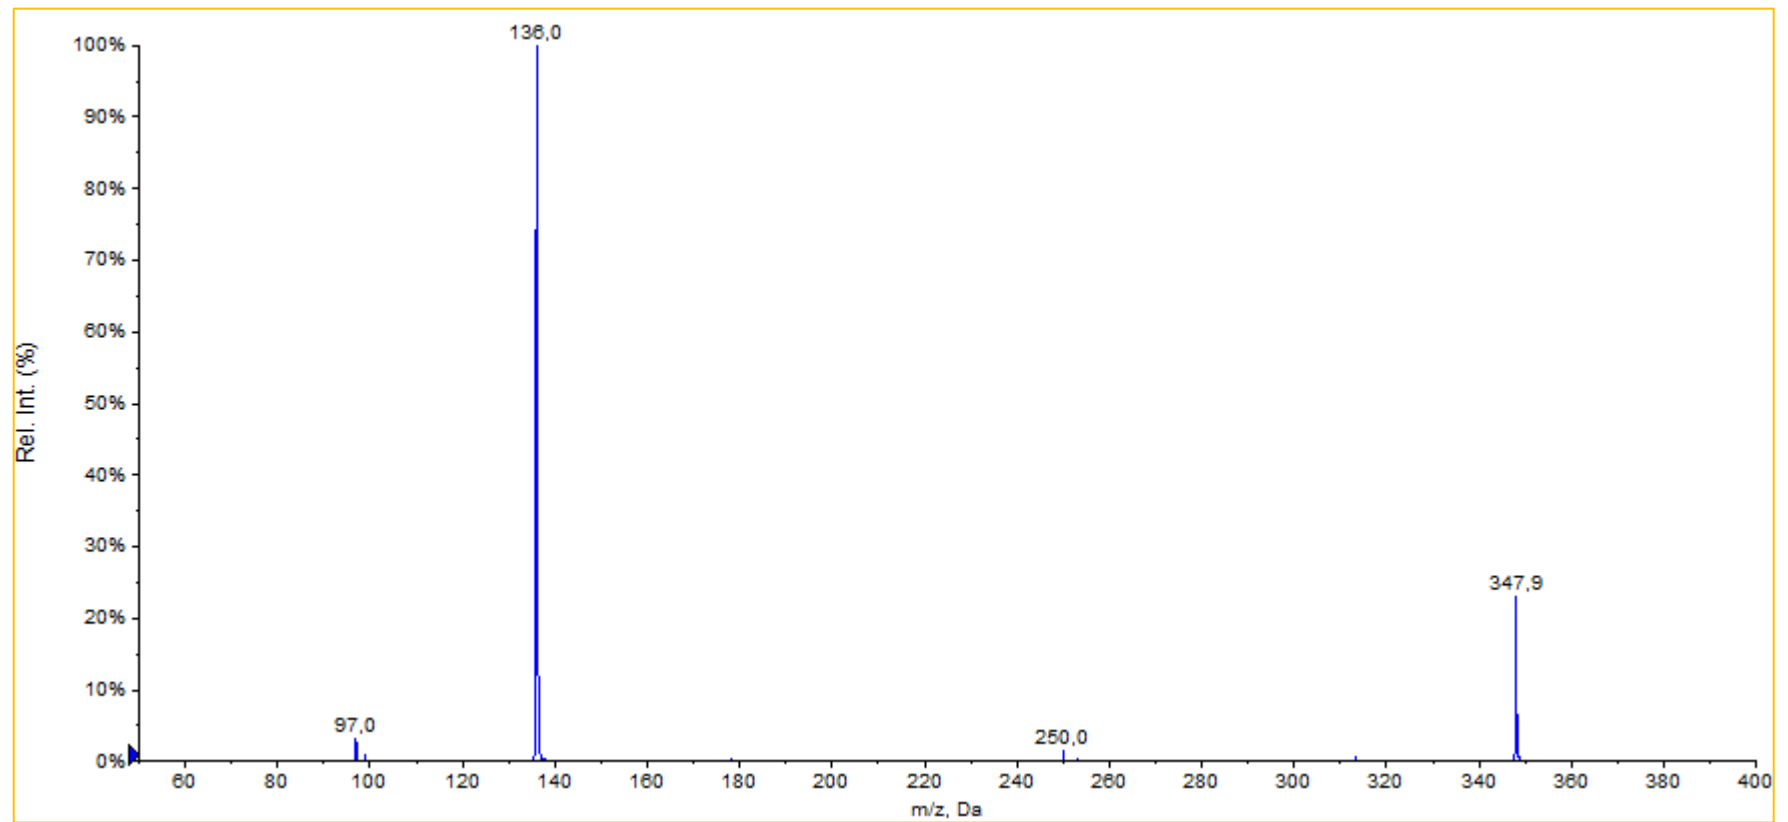



API 3200 AB Sciex, AMP, CE 25 ESI (+)

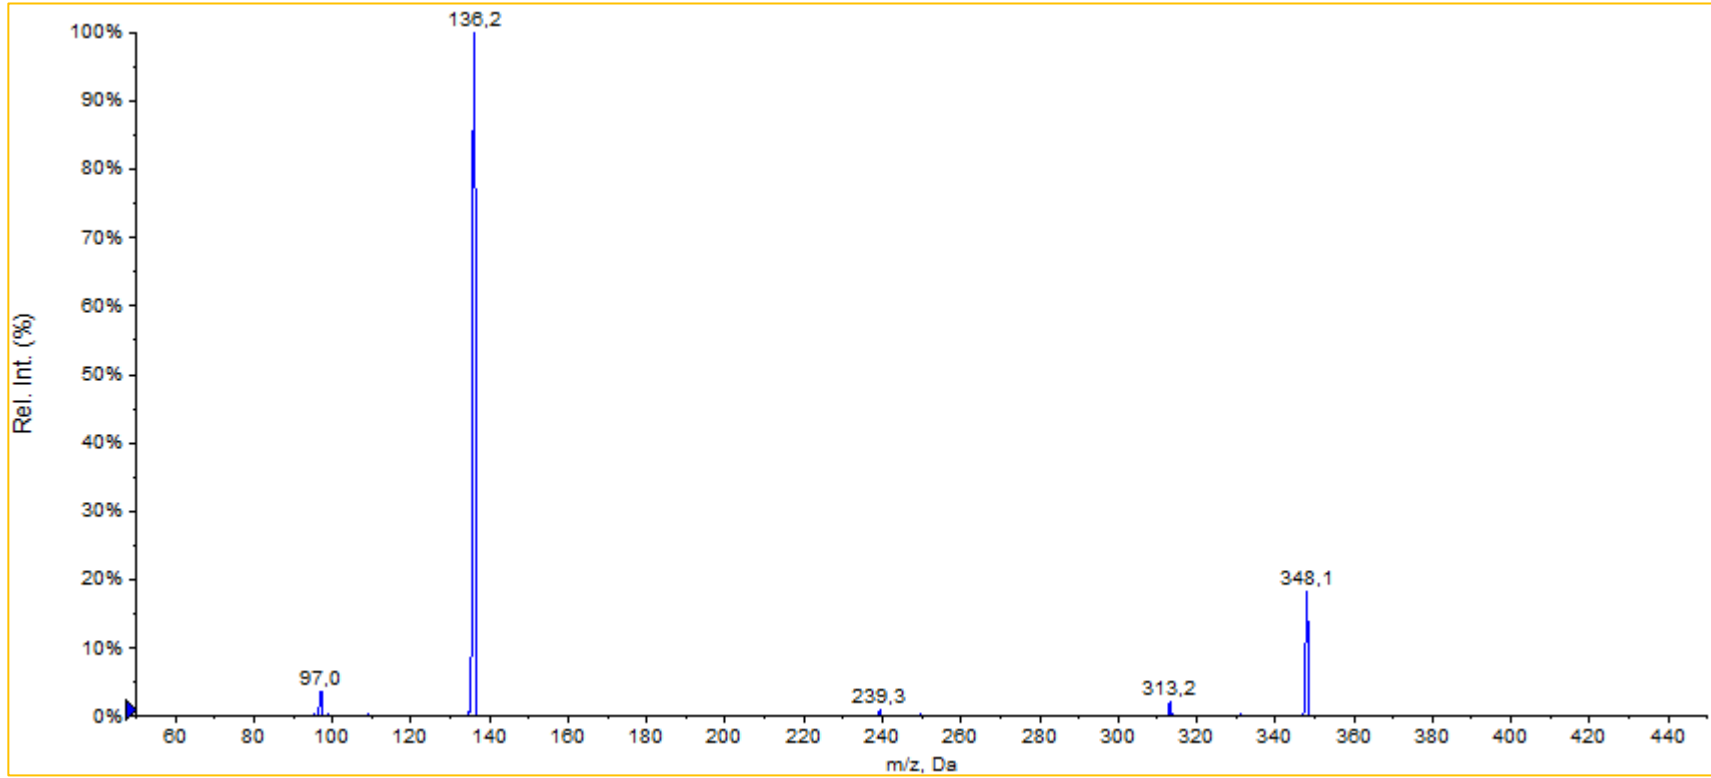

## References

- 1 Lin, L. *et al.* Facile synthesis of nucleoside 5'-(alpha-P-seleno)-triphosphates and phosphoroselenoate RNA transcription. *RNA* **17**, 1932-1938, doi:10.1261/rna.2719311 (2011).
- 2 Amir, A. *et al.* Nucleoside-5'-phosphorothioate analogues are biocompatible antioxidants dissolving efficiently amyloid beta-metal ion aggregates. *Dalton Transactions* **41**, 8539-8549, doi:10.1039/c2dt30631j (2012).
- 3 Haas, M., Ginsburg-Shmuel, T., Fischer, B. & Reiser, G. 5-OMe-uridine-5'-O-(alpha-boranodiphosphate), a novel nucleotide derivative highly active at the human P2Y(6) receptor protects against death-receptor mediated glial apoptosis. *Neuroscience Letters* **578**, 80-84, doi:10.1016/j.neulet.2014.06.030 (2014).
- 4 Guranowski, A. *et al.* Fhit proteins can also recognize substrates other than dinucleoside polyphosphates. *Febs Letters* **582**, 3152-3158, doi:10.1016/j.febslet.2008.07.060 (2008).
- 5 Kirschberg, T. *et al.* Synthesis and characterization of 1'-C-cyano-2'-fluoro-2'-C-methyl pyrimidine nucleosides as HCV polymerase inhibitors. *Bioorganic & Medicinal Chemistry Letters* **25**, 1040-1043, doi:10.1016/j.bmcl.2015.01.021 (2015).
- 6 Schelle, M. & Bertozzi, C. Sulfate metabolism in mycobacteria. *Chembiochem* **7**, 1516-1524, doi:10.1002/cbic.200600224 (2006).
- 7 Ghosh, B. *et al.* Nontoxic Chemical, Interdiction of the Epithelial-to-Mesenchymal Transition by Targeting Cap-Dependent Translation. *ACS Chemical Biology* **4**, 367-377, doi:10.1021/cb9000475 (2009).
- 8 Li, S. *et al.* Treatment of Breast and Lung Cancer Cells with a N-7 Benzyl Guanosine Monophosphate Tryptamine Phosphoramidate Pronucleotide (4Ei-1) Results in Chemosensitization to Gemcitabine and Induced eIF4E Proteasomal Degradation. *Molecular Pharmaceutics* **10**, 523-531, doi:10.1021/mp300699d (2013).
- 9 Wang, L. *et al.* Phosphorothioation of DNA in bacteria by dnd genes. *Nature Chemical Biology* **3**, 709-710, doi:10.1038/nchembio.2007.39 (2007).
- 10 Gollnest, T. *et al.* Membrane-permeable Triphosphate Prodrugs of Nucleoside Analogues. *Angewandte Chemie-International Edition* **55**, 5255-5258, doi:10.1002/anie.201511808 (2016).
- 11 Auriola, S., Frith, J., Rogers, M., Koivuniemi, A. & Monkkonen, J. Identification of adenine nucleotide-containing metabolites of bisphosphonate drugs using ion-pair liquid chromatography-electrospray mass spectrometry. *Journal of Chromatography B* **704**, 187-195, doi:10.1016/S0378-4347(97)00490-8 (1997).
- 12 Rogers, M., Russell, R., Blackburn, G., Williamson, M. & Watts, D. Metabolism of halogenated bisphosphonates by the cellular slime-mold dictyostelium-discoideum. *Biochemical and Biophysical Research Communications* **189**, 414-423, doi:10.1016/0006-291X(92)91574-A (1992).
- 13 Frith, J., Monkkonen, J., Blackburn, G., Russell, R. & Rogers, M. Clodronate and liposome-encapsulated clodronate are metabolized to a toxic ATP analog, adenosine 5'-(beta,gamma-dichloromethylene) triphosphate, by mammalian cells in vitro. *Journal of Bone and Mineral Research* **12**, 1358-1367, doi:10.1359/jbmr.1997.12.9.1358 (1997).
